1 **Role for novel family of pathogen-induced cysteine-**  
2 **rich transmembrane proteins in disease resistance**

3

4 **Marciel Pereira Mendes<sup>1</sup>, Richard Hickman<sup>1</sup>, Marcel C. Van Verk<sup>1,2</sup>, Nicole**  
5 **Nieuwendijk<sup>1</sup>, Anja Reinstädler<sup>3</sup>, Ralph Panstruga<sup>3</sup>, Corné M.J. Pieterse<sup>1</sup>, Saskia**  
6 **C.M. Van Wees<sup>1</sup>**

7

8 <sup>1</sup>Plant-Microbe Interactions, Department of Biology, Science4Life, Utrecht University,  
9 P.O. Box 800.56, 3508 TB, Utrecht, the Netherlands

10

11 <sup>2</sup>Bioinformatics, Department of Biology, Science4Life, Utrecht University,  
12 P.O. Box 800.56, 3508 TB, Utrecht, the Netherlands

13

14 <sup>3</sup>RWTH Aachen University, Institute for Biology I, Unit of Plant Molecular Cell Biology, Worringerweg 1,  
15 52056, Aachen, Germany

16

17 **Corresponding author:** Saskia C.M. van Wees; E-mail: [s.vanwees@uu.nl](mailto:s.vanwees@uu.nl)

18

19

20

21

22

23

24

25

26

27

28

29

30

31

32

33

34

35 **ABSTRACT**

36 Plants possess a sophisticated immune system to protect themselves against pathogen  
37 attack. The defense hormone salicylic acid (SA) is an important player in the plant  
38 immune gene regulatory network. Using RNA-seq time series data of *Arabidopsis*  
39 *thaliana* leaves treated with SA, we identified a largely uncharacterized SA-responsive  
40 gene family of eight members that are all activated in response to various pathogens or  
41 their immune elicitors and encode small proteins with cysteine-rich transmembrane  
42 domains. Based on their nucleotide similarity and chromosomal position, the designated  
43 Pathogen-induced Cysteine-rich transMembrane protein (PCM) genes were subdivided  
44 into three subgroups consisting of *PCM1-3* (subgroup I), *PCM4-6* (subgroup II), and  
45 *PCM7-8* (subgroup III). Of the *PCM* genes, only *PCM4* (also known as *PCC1*) has  
46 previously been implicated in plant immunity. Transient expression assays in *Nicotiana*  
47 *benthamiana* indicated that most PCM proteins localize to the plasma membrane.  
48 Ectopic overexpression of the *PCMs* in *Arabidopsis* resulted in all eight cases in  
49 enhanced resistance against the biotrophic oomycete pathogen *Hyaloperonospora*  
50 *arabidopsidis* Noco2. Additionally, overexpression of *PCM* subgroup I genes conferred  
51 enhanced resistance to the hemi-biotrophic bacterial pathogen *Pseudomonas syringae*  
52 *pv. tomato* DC3000. Ectopic overexpression of the *PCMs* also affected the expression  
53 of genes related to light signaling and development, and accordingly PCM-  
54 overexpressing seedlings displayed elongated hypocotyl growth. These results point to  
55 a function of *PCMs* in both disease resistance and photomorphogenesis, connecting  
56 both biological processes, possibly via effects on membrane structure or activity of  
57 interacting proteins at the plasma membrane.

58 **Key words:** comparative genomics, cysteine-rich transmembrane protein, biotrophic  
59 pathogens, immunity, salicylic acid, photomorphogenesis, light responses

60

61

62

63

64

65

66

67

## 68 INTRODUCTION

69 In nature and in agriculture, plants are exposed to many different pathogenic  
70 microorganisms. To counter these threats, plants have evolved a complex immune  
71 system that can perceive pathogens and activate an appropriate response. These  
72 induced defense responses aim to fortify physical barriers against pathogen entry such  
73 as callose (Luna et al., 2011). In addition, defensive compounds like secondary  
74 metabolites and pathogenesis-related proteins (PRs) accumulate, some of which have  
75 been demonstrated to possess *in vitro* antimicrobial activity and are associated with plant  
76 resistance (van Loon et al., 2006; Sels et al., 2008; Gamir et al., 2017). Plants can rely  
77 on a rich repertoire of defense compounds to combat different infecting agents. Still,  
78 many of the genes induced during pathogen infection have a so far unknown function,  
79 even though a role in defense can be expected for many of them.

80 The plant immune gene regulatory network that is activated in response to  
81 pathogen infection instructs which responses are expressed upon recognition of a  
82 specific invader. Conserved microbe-associated molecular patterns (MAMPs) and  
83 specific pathogen effectors can be perceived by matching receptors in the plant (Dodds  
84 and Rathjen, 2010), which subsequently activate diverse downstream signaling  
85 cascades that involve elevated levels of reactive oxygen species and calcium signaling,  
86 the modification of enzymes, and changes in hormone levels (Boller and Felix, 2009).  
87 The phytohormone salicylic acid (SA) plays a key role as signaling molecule in the  
88 regulation of plant immune responses that are primarily effective to fight biotrophic  
89 pathogens (Fu and Dong, 2013). In SA-activated cells, the transcriptional cofactor  
90 NONEXPRESSOR OF PR GENES1 (NPR1) interacts with members of the TGA family  
91 of transcription factors, leading to transcriptional activation of different other transcription  
92 factors, like members of the WRKY family, and downstream SA-responsive defense  
93 genes (Tsuda and Somssich, 2015). Microarray analysis of *Arabidopsis thaliana*  
94 (hereafter: *Arabidopsis*) plants expressing an NPR1-GR (glucocorticoid receptor) fusion  
95 protein (Wang et al., 2006) showed that several well-known SA-related genes, like PRs  
96 and WRKYs, were among the differentially expressed genes (DEGs) following SA  
97 treatment and dexamethasone-induced nuclear localization of NPR1. Almost 20% of the  
98 64 direct target genes regulated by NPR1 were described as having an unknown or  
99 uncharacterized function.

100 While the role of SA in regulating responses to pathogen infection is well  
101 established, it is also known to have a broader influence, regulating responses to abiotic  
102 stresses, such as cold, heat shock, drought, high salinity, UV radiation, and shade  
103 avoidance (Hayat et al., 2010; Nozue et al., 2018). SA also impacts plant growth by  
104 inhibiting auxin (growth hormone) signaling and contributes to developmental processes

105 such as flower formation. The latter is delayed in SA-deficient Arabidopsis genotypes  
106 (*NahG* transgenic lines; *eds5* and *sid2* mutants), suggesting an interplay of SA with  
107 photoperiod and autonomous (flowering) pathways (Martinez et al., 2004; Rivas-San  
108 Vicente and Plasencia, 2011).

109 Even though the complete Arabidopsis genome has been known for nearly two  
110 decades (Arabidopsis-Genome-Initiative, 2000), a large fraction of the protein-coding  
111 genes is still lacking a meaningful functional characterization (Niehaus et al., 2015). A  
112 common starting point for gene characterization is to reveal the conditions under which  
113 a gene is expressed. Transcriptome analysis has been extensively used to pinpoint  
114 genes that are active in specific tissue/cell types, at developmental stages or in response  
115 to different stimuli. Recently, several research groups utilized time-series transcriptome  
116 experiments in the model plant Arabidopsis to gain insight into the topology of the gene  
117 regulatory network that is engaged under different conditions. These experiments  
118 provided a wealth predictions regarding functional and regulatory roles of complete sets  
119 of genes that are differentially expressed in diverse situations (Krouk et al., 2010; Breeze  
120 et al., 2011; Bar-Joseph et al., 2012; Windram et al., 2012; Lewis et al., 2015; Coolen et  
121 al., 2016; Hickman et al., 2017). In our recent study, we applied whole transcriptome  
122 shotgun sequencing (RNA-seq) time series and found that approximately one-third of the  
123 Arabidopsis genome was differentially expressed in leaves upon treatment with SA over  
124 a 16-h time course, with changes in gene expression occurring in well-defined process-  
125 specific waves of induction or repression (Hickman et al., 2019).

126 Here, this SA-responsive gene set was analyzed with the comparative genomics  
127 tools OrthoMCL and JackHMMER, which identified homologous groups of largely  
128 uncharacterized genes that may play a role in SA-associated immunity. This integrated  
129 analysis categorized over a hundred groups of SA-responsive genes, including one  
130 group of eight genes encoding short proteins that share a predicted cysteine-rich  
131 transmembrane domain and are also responsive to various pathogens and immune  
132 elicitors. We therefore named them Pathogen-induced Cysteine-rich transMembrane  
133 proteins (PCMs). The *PCMs* are also present in the group of NPR1-regulated direct  
134 target genes, mentioned above. Cysteine-rich repeat proteins have been predicted to be  
135 involved in biotic and abiotic stress responses (Venancio and Aravind, 2010). For one of  
136 the family members (*PCC1/PCM4*) a role as positive regulator of defense to the  
137 biotrophic pathogen *Hyaloperonospora arabidopsidis* has been demonstrated  
138 (Sauerbrunn and Schlaich, 2004), while for another family member (*CYSTM3/PCM8*) a  
139 role as negative regulator of salt stress responses has been reported (Xu et al., 2019).  
140 Analysis of Arabidopsis PCM-overexpressing lines revealed a positive role of these  
141 proteins in immunity against pathogens with (hemi)biotrophic lifestyles. Furthermore, we

142 expanded the potential scope of their function to a role in photomorphogenesis and  
143 hypocotyl development.

144

## 145 **RESULTS**

### 146 **Analysis of uncharacterized SA-responsive genes identifies a family of cysteine-** 147 **rich transmembrane proteins**

148 Recently, we used high-throughput RNA-seq analysis to profile genome-wide changes  
149 in mRNA abundance in Arabidopsis leaves following treatment with SA over a 16-h  
150 period. Analysis of these transcriptome data identified 9524 genes that were differentially  
151 expressed between mock- and SA-treated leaves (Hickman et al., 2019). Subsequent  
152 investigation of functional annotations associated with these differentially expressed  
153 genes (DEGs) revealed that 630 of these genes encode proteins of unknown or  
154 uncharacterized function. Because of the central role of SA in defense against pathogen  
155 infection we hypothesized that among these genes would be genes with undiscovered  
156 roles in plant immunity. To simplify the analysis and functional interpretation of these  
157 uncharacterized genes, we first divided them in groups based on amino acid sequence  
158 similarity. To achieve this, we used OrthoMCL (Li et al., 2003), which is a tool for  
159 identifying homologous relationships between sets of proteins. This analysis resulted in  
160 a division of 101 groups of putative homologs, each comprising between two and nine  
161 members (Supplemental Data set 1; Figure 1A). Because we were specifically interested  
162 in genes that are involved in defense against pathogens, we analyzed gene behavior,  
163 using available gene expression data from Genevestigator  
164 (<http://www.genevestigator.ethz.ch/>) (Hruz et al., 2008). This pointed to a group of seven  
165 genes that were highly induced by a variety of immune elicitors and pathogens (Figure  
166 2A) and that were responsive to SA in our RNA-seq experiment (Figure 2B).

167 To identify all possible paralogs (including remote paralogs), the seven genes  
168 were used as queries in JackHMMER (Finn et al., 2015)  
169 ([www.ebi.ac.uk/Tools/hmmer/search/jackhmmer](http://www.ebi.ac.uk/Tools/hmmer/search/jackhmmer)). JackHMMER is a highly sensitive  
170 homology detection tool that can identify shared protein domains among matched  
171 sequences, as defined according to Pfam domains (Finn et al., 2015). This analysis led  
172 to the prediction of seven additional paralogs (Supplemental Data set 2). Next, we  
173 quantified the degree of nucleotide sequence identity between the 14 proteins by  
174 constructing a nucleotide sequence identity matrix (Figure 1B), which was followed by  
175 unsupervised clustering of the similarity matrix, leading to the identification of a distinct  
176 family of eight small genes (<82 amino acids (AA)) with high nucleotide sequence identity  
177 (>38%). All of the seven originally selected genes of unassigned function belong to this  
178 group, including *PCC1* (*PCM4* in Figure 1), which has a reported role in defense and is

179 regulated by the circadian clock (Sauerbrunn and Schlaich, 2004). One other member,  
180 *CYSTM3* (*PCM8* in Figure 1), has very recently also been characterized and shown to  
181 negatively influence salt stress resistance (Xu et al., 2019). Supplemental Table 1 lists  
182 all the *PCM* genes with their AGI number and alternative name. The genes in this family  
183 all encode short proteins (71-82 AA) with a conserved cysteine-rich transmembrane  
184 (*CYSTM*) domain, as predicted by the JackHMMER analyses (Figure 1C). To reflect their  
185 regulation and enrichment for cysteine residues in the encoded proteins, this eight-  
186 member gene family was named pathogen-induced cysteine-rich transmembrane  
187 proteins (*PCMs*). The *PCM* gene family contains two distinct gene clusters; the *PCM1*,  
188 *PCM2* and *PCM3* genes are situated in tandem on Arabidopsis chromosome 2, while  
189 *PCM4* (*PCC1*), *PCM5* and *PCM6* are tandemly arrayed on chromosome 3 (Figure 1D).  
190 Furthermore, *PCM7* and *PCM8* (*CYSTM3*) are positioned at distant locations on  
191 chromosome 1. The expression behavior of the eight *PCM* genes is broadly along the  
192 lines of the three subgroups, showing overlap but also differences with members of the  
193 other subgroups (Figure 2A and 2B). This is in accordance with varying  
194 overrepresentation of different transcription factor-binding DNA motifs in the promoters  
195 of the eight *PCM* genes (Figure 2C). The remainder of this paper explores the  
196 significance of the *PCM* protein family and its three subgroups in plant immunity and  
197 development.

198

### 199 **Subcellular localization of PCMs**

200 The characteristic *CYSTM* domain that resides in the *PCM* protein family is encoded by  
201 a total of 98 genes across 33 plant species (Supplemental Figure 1). Transmembrane  
202 domains enable protein functions across membranes (Luschnig and Vert, 2014) (Sharpe  
203 et al., 2010) and are often conserved across kingdoms when the respective protein has  
204 a specialized function (e.g., photoreceptors in eyes of mammals and insects) (Fischer et  
205 al., 2004). To begin to characterize the *PCMs*, we determined their subcellular  
206 localization by fusing the Venus yellow fluorescent protein (YFP) to the C-terminus of all  
207 eight *PCM* proteins and expressing these fusion proteins under the control of the  
208 constitutively active cauliflower mosaic virus (CaMV) 35S promoter. Expression of empty  
209 vector (EV-YFP, resulting in free YFP) served as a control, and the dye FM 4-64 was  
210 used as a membrane marker. Confocal microscopy analysis of *Agrobacterium*-infiltrated  
211 *Nicotiana benthamiana* leaves transiently expressing the fusion proteins, confirmed  
212 plasma membrane localization for five of the *PCM*-YFP variants (Figure 3). In case of  
213 the *PCM1*, *PCM2*, *PCM3*, *PCM4* and *PCM5* fusion proteins, the YFP signal overlapped  
214 with the fluorescent signal of the plasma membrane-localized FM 4-64 dye, suggesting  
215 plasma membrane localization of these proteins. By contrast, in case of the YFP-tagged



216 family members PCM6, PCM7 and PCM8 the YFP signals were detected prevalently in  
217 the cytoplasm and the nucleus, which could either be indicative of a non-membrane  
218 localization of these proteins or reflect undesired cleavage of the YFP label.

219

### 220 **PCM coexpression analysis points to specificity in PCM function**

221 Because genes with related biological functions often have similar expression patterns,  
222 a well-established method to investigate gene function is the construction and analysis  
223 of gene coexpression networks (Vandepoele et al., 2009). Using the eight *PCM* genes  
224 as query we generated *PCM* coexpression networks using publicly available microarray  
225 and RNA-seq datasets with the ATTED-II coexpression tool (Obayashi et al., 2017)  
226 (Figure 4). The *PCM* coexpression network was enriched for genes associated with  
227 defense responses ( $P < 0.01$ ; hypergeometric test) and included known defense-related  
228 genes such as *LURP1*, *ACD6*, *RLP36*, *NTL6*, *NAC61*, *NAC90*, *ZFAR*, *PDR12*, *WRKY75*  
229 and *MPK11*, suggesting a role for the PCM protein family in plant defense. Within the  
230 *PCM* coexpression network, coexpression neighborhoods of members of the three *PCM*  
231 sub-groups (Figure 2) overlap. Interestingly, the coexpression neighborhood occupied  
232 by subgroup II (*PCM4*, *PCM5* and *PCM6*) was distinct from that of all other *PCM* genes.  
233 Also, *PCM7* was part of a relatively isolated coexpression subnetwork. On the other  
234 hand, *PCM8* shared its coexpression neighborhood to a large extent with that of  
235 subgroup I (*PCM1*, *PCM2* and *PCM3*). In sum, our coexpression network analysis  
236 suggests a role for all eight *PCM* genes in plant defense, but also highlights subnetworks,  
237 suggesting functional diversification and/or differential regulation of the *PCM* subgroups.  
238 This notion is further supported by the distinct gene expression behavior of the different  
239 *PCM* subgroups after treatment with pathogens or exogenous SA and the presence of  
240 different transcription factor binding sites in the promoters of the *PCM* genes (Figure 2C).

241

### 242 **PCM-overexpressing lines show enhanced resistance to (hemi)-biotrophic** 243 **pathogens**

244 To investigate the hypothesis that members of the PCM protein family play a role in plant  
245 immunity, transgenic Arabidopsis lines expressing the individual *PCM* genes under the  
246 control of the CaMV 35S promoter were generated. The transgenic *PCM*-overexpression  
247 (*PCM-OX*) lines were of unaltered size and did not show any obvious developmental  
248 abnormalities (Supplemental Figure S2). RNA-seq analysis (see below) confirmed the  
249 overexpression status of the *PCM-OX* lines for genes *PCM1* and *PCM7*, but not for  
250 *PCM5* whose overexpression levels might have remained below the thresholds of  
251 statistical analysis (Supplemental Data set 2). Because the *PCM* gene family responded  
252 to exogenous SA treatment (Figure 2B), the *PCM-OX* lines were screened for an altered

253 level of resistance to two pathogens that are controlled by SA-dependent defenses: the  
254 obligate biotrophic oomycete *H. arabidopsidis* Noco2 (*Hpa* Noco2) and the hemi-  
255 biotrophic bacterium *P. syringae* pv. *tomato* DC3000 (*Pto* DC3000). For both assays, the  
256 performance of 5-week-old *PCM*-OX lines was compared to that of the wild-type (Col-0)  
257 and the enhanced susceptible mutant *eds1-2* of the same age. With the exception of  
258 *PCM6*, overexpression of all other *PCM* genes led to reduced *Hpa* Noco2 spore  
259 formation when compared to wild-type plants (Figure 5A). *Pto* DC3000 propagation was  
260 significantly decreased in the *PCM1*-OX, *PCM2*-OX, and *PCM3*-OX lines but not in the  
261 other lines (Figure 5B). These findings suggest that the vast majority of *PCM* family  
262 members is positively involved in host defense against *Hpa* Noco2, while a protective  
263 effect against *Pto* DC3000 is only evident for the subgroup I of the *PCM* protein family  
264 comprising *PCM1*, *PCM2*, and *PCM3*.

265

### 266 **Transcriptome analysis of *PCM*-OX lines reveals no upregulation of typical** 267 **immune responses**

268 To gain insight into the mechanisms underlying the enhanced disease resistance  
269 phenotype obtained by overexpression of the *PCM* genes, we analyzed the  
270 transcriptome of three *PCM*-OX lines, each representing a member of the three *PCM*  
271 subgroups: *PCM1*-OX (subgroup I), *PCM5*-OX (subgroup II), and *PCM7*-OX (subgroup  
272 III). RNA-seq analysis was performed on leaf tissue harvested from 5-week-old, non-  
273 treated plants. Differential expression analysis revealed that in the *PCM1*-OX, *PCM5*-OX  
274 and *PCM7*-OX lines 934, 873, and 515 genes, respectively, were differentially expressed  
275 in comparison to wild-type Col-0 plants ( $P < 0.05$ , fold change  $> 2$ ) (Supplemental Data  
276 set 2). Among the DEGs there were *PCM1* in the *PCM1*-OX line and *PCM7* in the *PCM7*-  
277 OX line, each showing a 2-fold log increase in transcript abundance. Notably, the list of  
278 DEGs comprised no other *PCM* gene in any of the overexpression lines, indicating that  
279 there is no compensatory regulation of other family members in this situation. There was  
280 considerable overlap between the expression profiles of the three *PCM*-OX lines (Figure  
281 6A). Of all DEGs, 27% were upregulated or downregulated in all three lines (in the same  
282 direction), whereas 44% were specifically up- or downregulated in a single  
283 overexpression line (Figure 6B). More genes were downregulated (60%) than  
284 upregulated (40%).

285 The overlapping 131 upregulated DEGs shared by all three *PCM*-OX lines were  
286 not enriched for typical immunity-related functions (Figure 7). Instead, the term 'circadian  
287 rhythm' was the most significantly enriched specific category, with additional enriched  
288 terms including 'regulation of multicellular organismal development' 'plant cell wall  
289 loosening', and 'response to red or far red light'. The shared 214 downregulated DEGs



290 by all three *PCM-OX* lines were associated with functional categories such as 'rRNA  
291 processing', 'response to cytokinin' and 'response to light stimulus' (Figure 7). There was  
292 also no enrichment of purely immunity-related categories DEGs that were specifically  
293 up- or downregulated in any of the *PCM1-OX*, *PCM5-OX* or *PCM7-OX* lines. General  
294 terms like 'response to hormone' were overrepresented in different lines though, while  
295 'glycosinolate process' was specifically enriched in up-regulated DEGs of *PCM7-OX*,  
296 and 'nucleolus' was overrepresented in *PCM7-OX* (up- and downregulated) and *PCM5-OX*  
297 (only downregulated). Based on these data, we hypothesize that pathogen-induced PCM  
298 production contributes to an increased level of defense through an impact on  
299 developmental processes in the cells that may affect pathogen performance.

300

### 301 **Involvement of PCMs in hypocotyl elongation**

302 There was no clear link to plant immunity among the genes differentially expressed in  
303 the three *PCM-OX* lines assayed, while the association with developmental processes  
304 and light responses was obvious (Figure 7). In all three *PCM-OX* lines, the *HY5* and *HYH*  
305 genes, which are master regulators of light signaling and also respond to pathogen  
306 infection (Genevestigator data), were upregulated. This prompted us to investigate  
307 morphogenic responsiveness of the *PCM-OX* lines. In shade-avoiding plants such as  
308 Arabidopsis, perception of far-red light triggers morphological adaptations such as  
309 elongation of the hypocotyl and petioles in order to reach for better quality light (Ballaré,  
310 2014). The *hy5 hyh* double mutant, which is affected in *HY5* and its closely related *HY5*  
311 homolog (*HYH*), displays such elongated hypocotyl growth compared to wild-type plants  
312 when cultivated in white light (Van Gelderen et al., 2018). Unexpectedly, the hypocotyl  
313 length of the *PCM1-OX*, *PCM5-OX*, and *PCM7-OX* lines was also greater than that of  
314 the wild type, and the hypocotyl of *PCM7-OX* was even of the same size as that of the  
315 *hy5 hyh* double mutant (Figure 8). This points to a role for PCMs in modulating both  
316 growth and development. Possibly, the PCMs affect *HY5* protein activity or stability,  
317 which is compensated by an enhanced expression level of the *HY5* gene. Altogether,  
318 our data suggest dual roles for PCMs in defense and in photomorphogenesis.

319

## 320 **DISCUSSION**

321 Despite over two decades of research efforts focused on the model plant Arabidopsis, a  
322 significant fraction (over 13%) of genes found in this plant are not characterized to any  
323 extent (Luhua et al., 2013; Niehaus et al., 2015). Our analysis of SA-responsive genes  
324 in Arabidopsis leaves revealed that 630 genes encode proteins of unknown function.  
325 Using a protein homology search we grouped these uncharacterized genes into 101  
326 groups of paralogs that likely encode proteins with similar functions (Figure 1A;

327 Supplemental Data set 1). We validated whether such an approach could aid the  
328 functional annotation of groups of unknown genes. Therefore, we selected and further  
329 characterized a family of eight pathogen-induced cysteine-rich transmembrane proteins  
330 (PCMs). The *PCM* genes formed three subgroups, based on their nucleotide similarity  
331 and chromosomal position (Figure 1B and 1D). The expression profiles of the *PCM*  
332 members under different biotic stress conditions and SA treatment broadly followed that  
333 of the three subgroups, showing some overlap but also differences between the  
334 subgroups (Figure 2A and 2B). This is in agreement with the commonalities and  
335 dissimilarities in transcription factor binding sites detected in the promotor regions of the  
336 eight *PCM* genes (Figure 2C), and the overlap or isolation of the coexpression networks  
337 of the *PCM* genes (Figure 4).

338 Given the complexity of the *PCM* family and its overlap in coexpressed genes, we  
339 expected functional redundancy between members and thus resorted to using  
340 overexpression lines rather than knockout mutants for the functional analysis of this  
341 protein family. Overexpression of one *PCM* member of each of the three subgroups  
342 (*PCM1-OX*, *PCM5-OX* and *PCM7-OX*) revealed 27% overlap of all DEGs, and 44%  
343 specific expression by one of the *PCM* genes (Figure 6). A function for the PCMs in  
344 defense was evidenced by the enhanced resistance of *PCM* overexpression lines to the  
345 biotrophic pathogens *Hpa* Noco2 and *Pto* DC3000 (Figure 5). Moreover, *PCM*  
346 overexpression resulted in differential expression of genes related to light and  
347 development, and seedlings displayed elongated hypocotyl growth, suggesting an  
348 additional role for PCMs in photomorphogenesis (Figure 8). Though we only used single  
349 *PCM-OX* lines in our sets of experiments, the shared phenotypes regarding DEGs,  
350 pathogen resistance and photomorphogenesis suggest that these effects are authentic  
351 consequences of *PCM* overexpression and not the result of position effects of the  
352 transgenes.

353

### 354 **Membrane association of CYSTM domain-containing PCMs**

355 The PCMs are small proteins (<84 AA) that contain a predicted cysteine-rich  
356 transmembrane C-terminus domain (CYSTM), which is a rare domain, but highly  
357 conserved among eukaryotic organisms. CYSTM domain-containing proteins are  
358 present in diverse species, including *Arabidopsis*, *Caenorhabditis elegans*, *Candida*  
359 *albicans*, *Homo sapiens*, *Mus musculus*, *Oryza sativa*, *Saccharomyces cerevisiae* and  
360 *Zea mays* (Venancio and Aravind, 2010). The molecular mechanism by which the  
361 CYSTM module functions is not clear yet, but the proteins appear to play a role in stress  
362 tolerance, for example by altering the redox potential of membranes, thereby quenching

363 radical species to protect the plant, or by affecting membrane-associated protein  
364 functions (Kuramata et al., 2009; Venancio and Aravind, 2010).

365 The conserved cysteines may serve to interact with a ligand, e.g. other PCMs,  
366 which could result in homo- or heterodimerization as shown in yeast expression systems  
367 for several Arabidopsis PCM family members (Mir and Leon, 2014; Xu et al., 2018).  
368 However, the PCMs can potentially also interact with other protein partners, as shown  
369 for PCM4/PCC1, which interacts with its N-terminal part (cytoplasm-faced, non-CYSTM  
370 containing) with the subunit 5 of the COP9 signalosome at the plasma membrane. This  
371 may lead to post-translational control of multiple protein targets involved in diverse  
372 biological processes such as light signaling, development, and immunity (Mir et al., 2013;  
373 Mir and Leon, 2014).

374 We experimentally confirmed a tight association of PCM1-PCM5 with the cell  
375 periphery and the fluorescent FM4-64 marker (Figure 3), suggesting that these proteins  
376 are anchored to the plasma membrane. This localization could potentially promote a  
377 change in local lipid composition, as shown for PCM4/PCC1 (Mir et al., 2013), and also  
378 affect the membrane structure. This notion is supported by changes in gene expression  
379 observed in the *PCM-OX* lines, which highlighted enrichment in gene ontology (GO)  
380 terms related to 'response to lipid', cell wall modification', and 'regulation of development'  
381 (Figure 7). Moreover, membrane alterations may block the invasion of intracellular  
382 pathogens like *Hpa* (Figure 5A) that form an intricate interface with the host membrane.  
383 There may also be consequences for membrane permeability or activity of (defense  
384 regulatory) proteins associated with the plasma membrane. While plasma membrane  
385 localization of PCM1-PCM5 was supported by experiments using YFP-tagged PCMs in  
386 transiently transformed *N. benthamiana* leaves, this was not the case for PCM6-PCM8  
387 (Figure 3). The latter finding is consistent with a recent study by Xu et al. (2018) who  
388 also found cytoplasmic localization of these proteins using the same study system.  
389 However, these authors also reported cytoplasmic localization for PCM1, PCM2, PCM3  
390 and PCM5, for which we detected solely plasma membrane localization, which is in line  
391 with the expectations based on the presence of the CYSTM domain (Venancio and  
392 Aravind, 2010) and early reports on PCC1/PCM4 (Mir and Leon, 2014). At this point we  
393 cannot exclude that the nucleo-cytoplasmic localization of PCM6-PCM8 detected by us  
394 and others (Xu et al., 2018) is due to degradation of the PCM-YFP fusion protein in this  
395 experimental setup. Alternative experimental approaches such as biochemical analyses  
396 will thus be required to corroborate the subcellular localization of these proteins.

397

398

399

## 400 **The function of CYSTM domain-containing PCMs in plant defense**

401 The *PCM4* gene is also known as *PCC1* and has previously been identified as an early-  
402 activated gene upon infection with the bacterial pathogen *Pto* carrying the avirulence  
403 gene *AvrRpt2* and to be controlled by the circadian clock (Sauerbrunn and Schlaich,  
404 2004). Microarray analysis of *npr1-1* plants revealed that in addition to several *PR* genes,  
405 the expression of *PCC1/PCM4* and *PCM6* were affected in this mutant (Wang et al.,  
406 2006). Later, *PCC1/PCM4* was identified to be induced by UV-C light in an SA-  
407 dependent manner, potentially playing a role as activator of stress-stimulated flowering  
408 in *Arabidopsis* (Segarra et al., 2010). Transgenic plants carrying the  $\beta$ -glucuronidase  
409 (*GUS*) reporter gene showed that the expression of *PCC1/PCM4* in the seedling stage  
410 was confined to the root vasculature and the stomatal guard cells of cotyledons, but  
411 spread to the petioles and the whole limb of fully expanded leaves (Mir et al., 2013).  
412 *PCC1/PCM4-OX* lines showed enhanced resistance to *Hpa* (Sauerbrunn 2004; Figure  
413 5A), while RNAi plants were more susceptible to the hemi-biotrophic oomycete pathogen  
414 *Phytophthora brassicae* and more resistant to the necrotrophic fungal pathogen *Botrytis*  
415 *cinerea* when compared with wild-type plants (Mir et al., 2013). We confirmed that  
416 *PCC1/PCM4* overexpression lines are resistant to *Hpa* and extend this finding to  
417 additional PCMs: Overexpression of *PCM1*, *PCM2*, *PCM3*, *PCM5*, *PCM7*, and *PCM8*  
418 also provided protection against *Hpa* infection (Figure 5A). This points to a common  
419 underlying defense mechanism that is activated by the PCMs, which might be related to  
420 an altered membrane environment as we discussed in the previous paragraphs. This  
421 mechanism may also be responsible for the enhanced protection against *Pto* infection  
422 that we observed by overexpressing *PCM1*, *PCM2*, and *PCM3* (Figure 5B). The lack of  
423 effect on *Pto* of the other *PCM-OX* lines however also points to divergent effects of the  
424 different *PCMs*, which is corroborated by the partly distinct DEG sets of the *PCM1*-,  
425 *PCM5*-, and *PCM7-OX* lines (Figure 7B). We also assayed the *PCM1*, *PCM5* and *PCM7*  
426 overexpressors for resistance to the biotrophic powdery mildew fungus *Golovinomyces*  
427 *orontii*, but found that these lines displayed the same level of disease development  
428 (haustorium formation and macroscopic symptoms) as the wild type, whereas the  
429 positive control triple mutant *mlo2 mlo6 mlo12* was highly resistant (Supplemental Figure  
430 S3). It may be that the protection mechanism provided by the *PCMs* is not effective  
431 against this pathogen species, but it may also be that the species was so virulent that it  
432 could have overcome any quantitative resistance accomplished by *PCM* overexpression.  
433 Notably, *PCM-OX* lines did not show any morphological abnormalities such as dwarfism,  
434 and the RNA-seq data of the *PCM1*-, *PCM5*-, and *PCM7-OX* lines did not reveal any  
435 evidence for the constitutive expression of typical defense-related genes (such as *PR*  
436 genes) that would explain the enhanced disease resistance of these plant. In the future,

437 it will be of interest to elucidate the yet unrecognized mechanisms that contribute to this  
438 phenotype. Conditioned by the antagonistic interplay of defense-associated  
439 phytohormones (Leon-Reyes et al., 2010), plants with enhanced resistance to biotrophic  
440 pathogens often show enhanced susceptibility to necrotrophic pathogens. For instance  
441 infection with hemi-biotrophic *Pseudomonas syringae*, which induces SA-mediated  
442 defense, rendered plants more susceptible to the necrotrophic pathogen *Alternaria*  
443 *brassicicola* by suppression of the JA signaling pathway (Spoel et al., 2007). It will thus  
444 be also interesting to explore how the *PCM-OX* lines perform upon challenge with  
445 necrotrophic pathogens.

446

#### 447 **Interplay between immunity and photomorphogenesis**

448 Our transcriptome data revealed that the *PCM1-*, *PCM5-*, and *PCM7-OX* lines were  
449 primarily enriched for genes and biological functions related to circadian rhythm, light  
450 signaling, and growth and development (Figure 7). The *PCM4/PCC1* gene had  
451 previously been reported to respond to circadian rhythm and UV-C light, and to have an  
452 effect on stress-induced flowering (Segarra et al., 2010). Here, we show that the *PCM1-*  
453 , *PCM5-*, and *PCM7-OX* lines exhibit elongated hypocotyl growth compared to wild-type  
454 plants (Figure 8). This phenotype is shared with the *hy5 hyh* double mutant, suggesting  
455 that the *PCMs* promote photomorphogenesis. Several studies have addressed the  
456 connection between plant defense and light signaling; e.g. UV-C induces SA-dependent  
457 defenses, and high levels of far red light (as in shade) repress defense responses to both  
458 pathogen and insects, as reviewed by Ballaré (2014). A recent paper by Nozue et al.  
459 (2018) reported that SA pathway genes are key components of shade avoidance, that  
460 *PCM4* and *PCM5* are downregulated by high far red levels, and that these genes have  
461 an altered expression level in shade avoidance syndrome mutants. Therefore, a double  
462 role for the *PCMs* in defense and photomorphogenesis is not unexpected. How the  
463 *PCMs* accomplish this dual function is not clear yet. Like discussed earlier, the *PCMs*  
464 might influence membrane structure and activity of proteins that reside in the membrane  
465 or that bind to *PCMs*, like the subunit 5 of the COP9 signalosome (Mir et al., 2013; Mir  
466 and Leon, 2014). These diverse effects may independently influence defense and  
467 photomorphogenesis, but an interdependence between the two biological processes,  
468 where one is a consequence of the other, is also a possibility.

469 In conclusion, our approach led to the identification of the family of *PCM* proteins  
470 that carry the distinctive CYSTM module, and which have a broad biological impact on  
471 plant performance, as shown by the enhanced protection against biotrophic pathogens  
472 and the enhanced hypocotyl growth in *PCM-OX* lines. We elucidated some molecular  
473 effects of the *PCMs* by showing that the majority of the *PCM* members localize to the



474 plasma membrane, that the *PCM* genes are responsive to SA and pathogen challenge,  
475 and that overexpression of *PCMs* leads to the induction of genes associated with light  
476 responses and development, but not to typical defense-associated responses.

477

## 478 **MATERIAL AND METHODS**

### 479 **Plant material and cultivation conditions**

480 *Arabidopsis thaliana* wild type accession Col-0, mutant *eds1-2* (Bartsch et al., 2006),  
481 triple mutant *mlo2-5 mlo6-2 mlo12-1* (Consonni et al., 2006), *hy5 hyh* (Van Gelderen et  
482 al., 2018) and *PCM* overexpression lines were used in this study. For whole plant assays  
483 with pathogen infection and SA treatment, the seeds were stratified for 48 h in 0.1% agar  
484 at 4°C prior to sowing them on river sand that was saturated with half-strength Hoagland  
485 nutrient solution containing 10 mM Sequestreen (CIBA-GEIGY GmbH, Frankfurt,  
486 Germany). After 2 weeks, the seedling were transferred to 60-mL pots containing a  
487 soil:river sand mixture (12:5 vol/vol) that had been autoclaved twice for 1 h. Plants were  
488 cultivated in standardized conditions under a 10-h day (75  $\mu\text{mol m}^{-2} \text{s}^{-1}$ ) and 14-h night  
489 cycle at 21°C and 70% relative humidity. Plants were watered every other day and  
490 received modified half-strength Hoagland nutrient solution containing 10 mM  
491 Sequestreen (CIBA-GEIGY GmbH, Frankfurt, Germany) once a week. To minimize  
492 within-chamber variation, all the trays, each containing a mixture of plant genotype or  
493 treatments, were randomized throughout the growth chamber once a week. For the  
494 hypocotyl elongation assay seeds were surface-sterilized and sown on MS plates (8 g l<sup>-1</sup>  
495 agar and 1 g L<sup>-1</sup> Murashige and Skoog (Duchefa Biochemie B.V., Haarlem, The  
496 Netherlands)). The seeds were stratified in the dark at 4°C for 2-3 days before being  
497 moved to a climate chamber with long-day conditions (16 h light : 8 h dark). After 7 days  
498 the plates were photographed and hypocotyl length was measured using ImageJ as  
499 described previously (De Wit et al., 2016).

500 The *Arabidopsis PCM* overexpression lines were generated by amplifying the  
501 coding sequence of genes *At2g32190* (*PCM1*), *At2g32200* (*PCM2*), *At2g32210* (*PCM3*),  
502 *At3g22231* (*PCM4/PCC1*), *At3g22235* (*PCM5*), *At3g22240* (*PCM6*), *At1g05340* (*PCM7*)  
503 and *At1g56060* (*PCM8/ATCYSTM3*) from accession Col-0. The *PCM* genes were part  
504 of a recent paper by Xu et al. (2018) and were named differently in the present study, as  
505 clarified in Supplemental Table S1. The primers used for cloning are also listed in  
506 Supplemental Table S1. The DNA sequence of the PCR fragments was verified and then  
507 cloned using Gateway® cloning (Invitrogen) in the pENTR vector, and subsequently in  
508 the pFAST-GO2 Gateway® (Shimada et al., 2010) compatible binary vector under  
509 control of the CaMV 35S promoter, followed by sequence verification. Binary vectors  
510 were transformed into *Agrobacterium tumefaciens* strain C58C1 containing pGV2260,



511 which was used to transform accession Col-0 using the floral dip method (Clough and  
512 Bent, 1998). Transformants were selected by growth on  $\frac{1}{2}$  MS plates containing DL-  
513 Phosphinothricin BASTA, and resistant T<sub>1</sub> seedlings were transplanted to soil for seed  
514 production. T<sub>2</sub> lines were selected for single insertion of the transgenes using BASTA  
515 resistance. Finally, T<sub>3</sub> seeds were screened for homozygosity using GFP signal in dry  
516 seed coating marker. Experiments were performed using homozygous T<sub>3</sub> or T<sub>4</sub> seeds.

517

### 518 **RNA-seq library preparation and sequencing**

519 The experimental design of the RNA-seq time series experiment with SA-treated  
520 Arabidopsis leaves has been described previously (Hickman et al., 2019). In brief, the  
521 rosettes of 5-week-old Arabidopsis accession Col-0 plants were dipped into a solution  
522 containing 1 mM SA (Mallinckrodt Baker) and 0.015% (v/v) Silwet L77 (Van Meeuwen  
523 Chemicals BV). For mock treatments, plants were dipped into a solution containing  
524 0.015% (v/v) Silwet L77. The sixth leaf (counted from the oldest to the youngest) was  
525 harvested from four individual SA- or mock-treated plants at each of the following time  
526 points post-treatment: 15 min, 30 min and 1, 1.5, 2, 3, 4, 5, 6, 7, 8, 10, 12 and 16 h. Total  
527 RNA was extracted using the RNeasy Mini Kit (Qiagen), including a DNase treatment  
528 step in accordance with the manufacturer's instructions. RNA-seq library preparation and  
529 sequencing was performed by UCLA Neuroscience Genomics Core (Los Angeles, CA,  
530 USA). Sequencing libraries were prepared using the Illumina TruSeq RNA Sample Prep  
531 Kit, and sequenced on the Illumina HiSeq 2000 platform with single read lengths of 50  
532 bases.

533 For the comparison of the *PCM1-OX*, *PCM5-OX* and *PCM7-OX* lines with wild-  
534 type Col-0, two mature leaves (developmental leaf number six and seven) were  
535 harvested from two 5-week-old plants per genotype, resulting in two biological replicates.  
536 RNA-seq library preparation and sequencing was performed by the Utrecht Sequencing  
537 Facility (Utrecht, Netherlands). Sequencing libraries were prepared using the Illumina  
538 Truseq mRNA Stranded Sample Prep Kit, and sequenced on the Illumina NextSeq 500  
539 platform with read lengths of 75 bases.

540

### 541 **RNA-seq analysis**

542 Quantification of gene expression from RNA-seq data was performed as described  
543 previously (Caarls et al., 2017; Hickman et al., 2017). Reads were mapped to the  
544 Arabidopsis genome (TAIR version 10) using TopHat version 2.0.4 (Trapnell et al., 2009)  
545 and aligned reads summarized over annotated gene models using HTseq-count (Anders  
546 et al., 2015). Genes that were significantly altered over time in response to SA in  
547 comparison to the mock treatment were identified using a generalized linear model

548 implemented with the R statistical environment ([www.r-project.org](http://www.r-project.org)). Genes that were  
549 differentially expressed between Col-0 and *PCM1-OX*, *PCM5-OX*, or *PCM7-OX* were  
550 identified using DESeq2 (Anders and H., 2010; Love et al., 2014).

551

### 552 **Identification of uncharacterized gene families**

553 Protein sequences of the 630 SA-responsive DEGs with unknown/uncharacterized  
554 function (based on gene annotations retrieved from TAIR version 10 (retrieved in 2016)  
555 were run through OrthoMCL with default parameters ([www.orthomcl.org](http://www.orthomcl.org)) (Li et al., 2003).  
556 JackHMMER ([www.ebi.ac.uk/Tools/hmmer/search/jackhmmer](http://www.ebi.ac.uk/Tools/hmmer/search/jackhmmer)) was then used to identify  
557 additional paralogs belonging to the groups identified with OrthoMCL. The phylogentic  
558 tree of PCM homologs was generated using PLAZA v4.0  
559 (<https://bioinformatics.psb.ugent.be/plaza/>) with the *PCM1* gene as a query (Van Bel et  
560 al., 2018).

561

### 562 **Determination of transcription factor binding motifs**

563 Transcription factor-gene interactions were inferred from DAP-seq (DNA affinity  
564 purification sequencing) experiments, which provide the genome-wide binding profiles of  
565 in-vitro-expressed TFs (O'Malley et al., 2016). DAP-seq peaks for 349 Arabidopsis  
566 transcription factors with a FRiP (fraction of reads in peaks) score  $\geq 5\%$  were retrieved  
567 from the Plant Cistrome DB (O'Malley et al., 2016). DAP-seq peaks were used to infer  
568 representation of DNA-binding motifs in the promoters of the *PCM* genes. Motifs are  
569 grouped according to cognate transcription factor family.

570

### 571 **Coexpression network analysis**

572 The *PCM* coexpression network was obtained using the ATTED-II Network Drawer tool  
573 with the Ath-r platform (<http://atted.jp/cgi-bin/NetworkDrawer.cgi>) (Obayashi et al., 2017)  
574 using the *PCM* genes as query genes. Coexpression networks were visualized using  
575 Cytoscape v.3.5.1 (Shannon et al., 2003).

576

### 577 **Functional enrichment analysis**

578 GO-term enrichment analysis on gene lists was performed using the GO term finder tool  
579 (Boyle et al., 2004). Where indicated, generic GO terms were removed from the analysis  
580 by limiting the maximum size of functional categories to 1500 genes.

581

582

583

## 584 **Construction of YFP-tagged PCMs and visualization by confocal microscopy**

585 For *in planta* localization experiments, cDNA extracted from Arabidopsis was used to  
586 amplify the CDSs without the stop codon of *PCMs* using the primers listed in the  
587 Supplemental Table 1. The PCR products containing *attB* sequence were cloned into  
588 the Gateway pDONR221 vector, then the resulting entry vectors containing *PCM* genes  
589 were recombined into the Gateway expression vector pB7WGY2, which contains the  
590 coding sequence of the Venus fluorescent protein (a YFP variant).

591 Competent cells of *A. tumefaciens* were transformed with the Gateway  
592 expression vector described in the previous paragraph made for protein localization.  
593 Transformed colonies were selected using the antibiotic resistance of vector and with  
594 rifampicin carried by *A. tumefaciens*. Single colonies were grown for 2 days at 28°C in  
595 20-mL LB medium under shaking conditions. After, the OD<sub>600</sub> was measured, the cells  
596 were pelleted and resuspended to a final OD<sub>600</sub> of 0.5 with a ½ MS medium (Duchefa  
597 Biochemie) supplemented with 10 mM MES hydrate (Sigma-Aldrich), 20 g L<sup>-1</sup> sucrose  
598 (Sigma-Aldrich), 200 µM acetosyringone (Sigma-Aldrich) at pH 5.6 and incubated in  
599 darkness for at least 1 h. The solutions were used to agroinfiltrated the abaxial side of 4-  
600 5-week-old *N. benthamiana* leaves using a 1-mL syringe. The plants were left to grow in  
601 normal light conditions and after 2 days leaf sections were taken from agroinfiltrated  
602 regions and visualized with confocal microscope.

603 Microscopy was performed using a Zeiss LM 700 (Zeiss, Germany) confocal  
604 laser-scanning microscope. Fresh leaf material was prepared on glass slide with cover  
605 slip. Excitation of YFP and RFP (plasma membrane FM4-46 dye (Sigma-Aldrich) plus  
606 autofluorescence of chlorophyll were done at 488 nm. Light emission of YFP was  
607 detected at 493-550 nm and the red signal for the FM4-46 dye at 644-800 nm. Analyses  
608 of the images were performed with ZEN lite (blue edition).

609

## 610 **Pathogen cultivation and bioassays**

611 *Hyaloperonospora arabidopsidis* isolate Noco2 (*Hpa* Noco2) spores were harvested  
612 from infected (*eds1-2* mutant) plants, eluted through Miracloth, and diluted in water to 50  
613 spores µL<sup>-1</sup>. For the disease bioassay, 5-week-old plants were spray-inoculated with this  
614 spore suspension. Plants were subsequently placed at 100% RH, under short day  
615 conditions (9 h light/15 h dark) at 16°C. After 9 days the spores from eight individual  
616 rosette plants were harvested in 5-mL of water and the number of spores per milligram  
617 of plant tissue (fresh weight of aerial parts) was counted using a light microscope. Spore  
618 counts in the mutant and overexpression lines were compared using ANOVA followed  
619 by Tukey's multiple comparison tests.

620 *Pseudomonas syringae* pv. *tomato* (*Pto*) DC3000 was cultured in King's B  
621 medium supplemented with 50 mg L<sup>-1</sup> rifampicine at 28°C overnight. Bacteria were  
622 collected by centrifugation for 10 min at 4000 rpm, and re-suspended in 10 mM MgSO<sub>4</sub>.  
623 The suspension was adjusted to OD<sub>600</sub>=0.0005 and pressure infiltrated into 3 mature  
624 leaves of 5-week-old plants with a needleless syringe. After 3 days, leaf discs of 5-mm  
625 diameter were harvested from two inoculated leaves per plant, representing a single  
626 biological replicate. Eight biological replicates were harvested for each genotype.  
627 Subsequently, 500 µL of 10 mM MgSO<sub>4</sub> was added to the leaf discs, after which they  
628 were ground thoroughly with metal beads using a TissueLyser (Qiagen). Serial ten-fold  
629 dilutions were made in 10 mM MgSO<sub>4</sub>, and 30 µl aliquots plated onto KB agar plates  
630 containing 50 mg mL<sup>-1</sup> rifampicine. After 48 h of incubation at 28°C, bacterial colonies  
631 were counted. Statistical analyses were performed using ANOVA followed by Tukey's  
632 multiple comparison test for means of log<sub>10</sub>-transformed colony counts.

633 For powdery mildew assays, Arabidopsis plants were inoculated with powdery  
634 mildew (*Golovinomyces orontii*) at roughly 2.5 cm rosette size (radius) at four to five  
635 weeks after germination. *G. orontii* is adapted to infection of Arabidopsis (Kuhn et al.,  
636 2016) and was cultivated on susceptible *eds1-2* plants. Inoculation was conducted by  
637 leaf-to-leaf transfer of conidiospores. Leaves from five individual plants were collected at  
638 48 hours post inoculation and bleached in 80% ethanol at room temperature for at least  
639 two to three days. Prior to microscopic analysis, fungal structures were stained by  
640 submerging the leaves in Coomassie staining solution (100% v/v ethanol acid, 0.6% w/v  
641 Coomassie blue R-250; Carl Roth, Karlsruhe, Germany) twice for 15-30 s and shortly  
642 washed in tap water thereafter. The samples were analyzed with an Axiophot microscope  
643 (Carl Zeiss AG, Jena, Germany). The fungal penetration rate was determined as the  
644 percentage of spores successfully developing secondary hyphae over all spores that  
645 attempted penetration, visible by an appressorium (Haustorium index). Macroscopic  
646 pictures of *G. orontii*-infected plants were taken at 12 days post inoculation with a Coolpix  
647 P600 camera (Nikon, Tokyo, Japan). Susceptible Col-0 and the fully resistant *mlo2-5*  
648 *mlo6-2 mlo12-1* triple mutant (Consonni et al., 2006) served as positive and negative  
649 control, respectively. Haustorium index in the mutant and overexpression lines were  
650 compared using ANOVA followed by Tukey's multiple comparison tests.

651

652

653

654

655 **Supplemental data**

656 **Supplemental Figure S1.** Phylogenetic relationship of closely related homologs of the *PCM* gene family in  
657 Arabidopsis and 32 other plant species. The PLAZA platform included the isoform of PCM8 in which the  
658 CYSTM domain is excised, for this reason, PCM8 is not included in the phylogenetic tree. Differently sized  
659 black dots indicate bootstrap support according to the legend on the top right.

660 **Supplemental Figure S2.** Arabidopsis *PCMs*-OX growth development. Representative photos of 5-week-  
661 old plants for each genotype.

662 **Supplemental Figure S3.** Powdery mildew (*Golovinomyces orontii*) infection phenotypes of *PCM*-OX lines.  
663 (A), Quantitative analysis of host cell entry (at 48 hours post inoculation) on wild-type Col-0, the fully resistant  
664 *mlo2-5 mlo6-2 mlo12-1* triple mutant and *PCM1*-OX, *PCM5*-OX and *PCM7*-OX lines. Letters denote  
665 significant differences between genotypes (one-way ANOVA, Tukey's post-hoc test,  $P < 0.05$ ). (B),  
666 Macroscopic infection phenotypes of the same lines as shown in (A) at 12 days post inoculation.

667 **Supplemental Table S1.** List of *PCM* genes, their AGI numbers (ID) and alternative names. Primer  
668 sequences used for cloning.

669 **Supplemental Data Set S1.** Set of 103 groups of putative homologs among the set of uncharacterized  
670 SA-induced genes, identified using OrthoMCL.

671 **Supplemental Data Set S2.** Genes differentially expressed in *PCM1*-OX, *PCM5*-OX and *PCM7*-OX lines  
672 in comparison to wild-type plants.

673 **Supplemental Data Set S3.** GO terms overrepresented in the DEG sets of *PCM1*-OX, *PCM5*-OX and  
674 *PCM7*-OX.

675 **Funding:** CAPES Foundation, Ministry of Education of Brazil (to M.P.M), Netherlands  
676 Organization for Scientific Research through the Dutch Technology Foundation (VIDI  
677 11281 to S.C.M.V.W. and VENI 13682 to R.H.), European Research Council (Grant  
678 269072 to C.M.J.P.).

679

680 **References**

- 681 **Anders, S., and H., W.** (2010). Differential expression analysis for sequence count data.  
682 *Genome Biology* **11**, R106.
- 683 **Anders, S., Pyl, P.T., and Huber, W.** (2015). HTSeq—a Python framework to work with high-  
684 throughput sequencing data. *Bioinformatics* **31**, 166-169.
- 685 **Arabidopsis-Genome-Initiative, T.** (2000). Analysis of the genome sequence of the flowering  
686 plant *Arabidopsis thaliana*. *Nature* **408**, 796-815.
- 687 **Ballaré, C.L.** (2014). Light regulation of plant defense. *Annu. Rev. Plant. Biol.* **65**, 335-363.
- 688 **Bar-Joseph, Z., Gitter, A., and Simon, I.** (2012). Studying and modelling dynamic biological  
689 processes using time-series gene expression data. *Nat Rev Genet* **13**, 552-564.
- 690 **Bartsch, M., Gobbato, E., Bednarek, P., Debey, S., Schultze, J.L., Bautor, J., and Parker, J.E.**  
691 (2006). Salicylic acid-independent ENHANCED DISEASE SUSCEPTIBILITY1 signaling in  
692 Arabidopsis immunity and cell death is regulated by the monooxygenase FMO1 and  
693 the Nudix hydrolase NUDT7. *Plant Cell* **18**, 1038-1051.



- 694 **Boller, T., and Felix, G.** (2009). A renaissance of elicitors: perception of microbe-associated  
695 molecular patterns and danger signals by pattern-recognition receptors. *Annu. Rev.*  
696 *Plant. Biol.* **60**, 379-406.
- 697 **Boyle, E.I., Weng, S.A., Gollub, J., Jin, H., Botstein, D., Cherry, J.M., and Sherlock, G.** (2004).  
698 GO::TermFinder - open source software for accessing Gene Ontology information and  
699 finding significantly enriched Gene Ontology terms associated with a list of genes.  
700 *Bioinformatics* **20**, 3710-3715.
- 701 **Breeze, E., Harrison, E., McHattie, S., Hughes, L., Hickman, R., Hill, C., Kiddle, S., Kim, Y.S.,**  
702 **Penfold, C.A., Jenkins, D., Zhang, C.J., Morris, K., Jenner, C., Jackson, S., Thomas, B.,**  
703 **Tabrett, A., Legaie, R., Moore, J.D., Wild, D.L., Ott, S., Rand, D., Beynon, J., Denby, K.,**  
704 **Mead, A., and Buchanan-Wollaston, V.** (2011). High-resolution temporal profiling of  
705 transcripts during *Arabidopsis* leaf senescence reveals a distinct chronology of  
706 processes and regulation. *Plant Cell* **23**, 873-894.
- 707 **Caarls, L., Van der Does, D., Hickman, R., Jansen, W., Verk, M.C., Proietti, S., Lorenzo, O.,**  
708 **Solano, R., Pieterse, C.M.J., and Van Wees, S.C.M.** (2017). Assessing the role of  
709 ETHYLENE RESPONSE FACTOR transcriptional repressors in salicylic acid-mediated  
710 suppression of jasmonic acid-responsive genes. *Plant Cell Physiol.* **58**, 266-278.
- 711 **Clough, S.J., and Bent, A.F.** (1998). Floral dip: a simplified method for *Agrobacterium*-mediated  
712 transformation of *Arabidopsis thaliana*. *Plant Journal* **16**, 735-743.
- 713 **Consonni, C., Humphry, M.E., Hartmann, H.A., Livaja, M., Durner, J., Westphal, L., Vogel, J.,**  
714 **Lipka, V., Kemmerling, B., Schulze-Lefert, P., Somerville, S.C., and Panstruga, R.**  
715 (2006). Conserved requirement for a plant host cell protein in powdery mildew  
716 pathogenesis. *Nature Genet.* **38**, 716-720.
- 717 **Coolen, S., Proietti, S., Hickman, R., Davila Olivas, N.H., Huang, P.P., Van Verk, M.C., Van Pelt,**  
718 **J.A., Wittenberg, A.H., De Vos, M., Prins, M., Van Loon, J.J., Aarts, M.G., Dicke, M.,**  
719 **Pieterse, C.M.J., and Van Wees, S.C.M.** (2016). Transcriptome dynamics of *Arabidopsis*  
720 during sequential biotic and abiotic stresses. *Plant Journal* **86**, 249-267.
- 721 **De Wit, M., Keuskamp, D.H., Bongers, F.J., Hornitschek, P., Gommers, C.M.M., Reinen, E.,**  
722 **Martinez-Ceron, C., Fankhauser, C., and Pierik, R.** (2016). Integration of phytochrome  
723 and cryptochrome signals determines plant growth during competition for light. *Curr.*  
724 *Biol.* **26**, 3320-3326.
- 725 **Dodds, P.N., and Rathjen, J.P.** (2010). Plant immunity: towards an integrated view of plant-  
726 pathogen interactions. *Nat Rev Genet* **11**, 539-548.
- 727 **Finn, R.D., Clements, J., Arndt, W., Miller, B.L., Wheeler, T.J., Schreiber, F., Bateman, A., and**  
728 **Eddy, S.R.** (2015). HMMER web server: 2015 update. *Nucleic Acids Res* **43**, W30-38.
- 729 **Fischer, J.A., Acosta, S., Kenny, A., Cater, C., Robinson, C., and Hook, J.** (2004). *Drosophila*  
730 *klarsicht* has distinct subcellular localization domains for nuclear envelope and  
731 microtubule localization in the eye. *Genetics* **168**, 1385-1393.
- 732 **Fu, Z.Q., and Dong, X.** (2013). Systemic acquired resistance: turning local infection into global  
733 defense. *Annu. Rev. Plant. Biol.* **64**, 839-863.
- 734 **Gamir, J., Darwiche, R., Van't Hof, P., Choudhary, V., Stumpe, M., Schneiter, R., and Mauch,**  
735 **F.** (2017). The sterol-binding activity of PATHOGENESIS-RELATED PROTEIN 1 reveals  
736 the mode of action of an antimicrobial protein. *Plant Journal* **89**, 502-509.
- 737 **Hayat, Q., Hayat, S., Irfan, M., and Ahmad, A.** (2010). Effect of exogenous salicylic acid under  
738 changing environment: A review. *Environ Exp Bot* **68**, 14-25.
- 739 **Hickman, R., Pereira Mendes, M., Van Verk, M.C., Van Dijken, A.J.H., Di Sora, J., Denby, K.,**  
740 **Pieterse, C.M.J., and Van Wees, S.C.M.** (2019). Transcriptional dynamics of the  
741 salicylic acid response and its interplay with the jasmonic acid pathway. *bioRxiv*,  
742 742742.
- 743 **Hickman, R., Van Verk, M.C., Van Dijken, A.J.H., Pereira Mendes, M., Vroegop-Vos, I.A.,**  
744 **Caarls, L., Steenbergen, M., Van der Nagel, I., Wesselink, G.J., Jironkin, A., Talbot, A.,**  
745 **Rhodes, J., De Vries, M., Schuurink, R.C., Denby, K., Pieterse, C.M.J., and Van Wees,**



- 746 S.C.M. (2017). Architecture and dynamics of the jasmonic acid gene regulatory  
747 network. *Plant Cell* **29**, 2086-2105.
- 748 Hruz, T., Laule, O., Szabo, G., Wessendorp, F., Bleuler, S., Oertle, L., Widmayer, P., Gruissem,  
749 W., and Zimmermann, P. (2008). Genevestigator V3: a reference expression database  
750 for the meta-analysis of transcriptomes. *Advances in Bioinformatics* **2008**: 420747.
- 751 Krouk, G., Mirowski, P., LeCun, Y., Shasha, D.E., and Coruzzi, G.M. (2010). Predictive network  
752 modeling of the high-resolution dynamic plant transcriptome in response to nitrate.  
753 *Genome Biology* **11**, R123.
- 754 Kuhn, H., Kwaaitaal, M., Kusch, S., Acevedo-Garcia, J., Wu, H., and Panstruga, R. (2016).  
755 Biotrophy at its best: novel findings and unsolved mysteries of the Arabidopsis-  
756 powdery mildew pathosystem. *Arabidopsis Book* **14**, e0184.
- 757 Kuramata, M., Masuya, S., Takahashi, Y., Kitagawa, E., Inoue, C., Ishikawa, S., Youssefian, S.,  
758 and Kusano, T. (2009). Novel cysteine-rich peptides from *Digitaria ciliaris* and *Oryza*  
759 *sativa* enhance tolerance to cadmium by limiting its cellular accumulation. *Plant Cell*  
760 *Physiology* **50**, 106-117.
- 761 Leon-Reyes, A., Van der Does, D., De Lange, E.S., Delker, C., Wasternack, C., Van Wees, S.C.,  
762 Ritsema, T., and Pieterse, C.M. (2010). Salicylate-mediated suppression of jasmonate-  
763 responsive gene expression in Arabidopsis is targeted downstream of the jasmonate  
764 biosynthesis pathway. *Planta* **232**, 1423-1432.
- 765 Lewis, L.A., Polanski, K., de Torres-Zabala, M., Jayaraman, S., Bowden, L., Moore, J., Penfold,  
766 C.A., Jenkins, D.J., Hill, C., Baxter, L., Kulasekaran, S., Truman, W., Littlejohn, G.,  
767 Prusinska, J., Mead, A., Steinbrenner, J., Hickman, R., Rand, D., Wild, D.L., Ott, S.,  
768 Buchanan-Wollaston, V., Smirnov, N., Beynon, J., Denby, K., and Grant, M. (2015).  
769 Transcriptional dynamics driving MAMP-triggered immunity and pathogen effector-  
770 mediated immunosuppression in Arabidopsis leaves following infection with  
771 *Pseudomonas syringae* pv tomato DC3000. *Plant Cell* **27**, 3038–3064.
- 772 Li, L., Stoeckert, C.J., Jr., and Roos, D.S. (2003). OrthoMCL: identification of ortholog groups  
773 for eukaryotic genomes. *Genome Res* **13**, 2178-2189.
- 774 Love, M.I., Huber, W., and Anders, S. (2014). Moderated estimation of fold change and  
775 dispersion for RNA-seq data with DESeq2. *Genome Biology* **15**, 550.
- 776 Luhua, S., Hegie, A., Suzuki, N., Shulaev, E., Luo, X., Cenariu, D., Ma, V., Kao, S., Lim, J.,  
777 Gunay, M.B., Oosumi, T., Lee, S.C., Harper, J., Cushman, J., Gollery, M., Girke, T.,  
778 Bailey-Serres, J., Stevenson, R.A., Zhu, J.K., and Mittler, R. (2013). Linking genes of  
779 unknown function with abiotic stress responses by high-throughput phenotype  
780 screening. *Physiologia Plantarum* **148**, 322-333.
- 781 Luna, E., Pastor, V., Robert, J., Flors, V., Mauch-Mani, B., and Ton, J. (2011). Callose  
782 deposition: a multifaceted plant defense response. *Molecular Plant-Microbe Interactions*  
783 **24**, 183-193.
- 784 Luschnig, C., and Vert, G. (2014). The dynamics of plant plasma membrane proteins: PINs and  
785 beyond. *Development* **141**, 2924-2938.
- 786 Martinez, C., Pons, E., Prats, G., and Leon, J. (2004). Salicylic acid regulates flowering time and  
787 links defence responses and reproductive development. *Plant Journal* **37**, 209-217.
- 788 Mir, R., and Leon, J. (2014). Pathogen and circadian controlled 1 (PCC1) protein is anchored to  
789 the plasma membrane and interacts with subunit 5 of COP9 signalosome in  
790 Arabidopsis. *PLoS One* **9**, e87216.
- 791 Mir, R., Hernandez, M.L., Abou-Mansour, E., Martinez-Rivas, J.M., Mauch, F., Mettraux, J.P.,  
792 and Leon, J. (2013). Pathogen and Circadian Controlled 1 (PCC1) regulates polar lipid  
793 content, ABA-related responses, and pathogen defence in *Arabidopsis thaliana*. *J. Exp.*  
794 *Bot.* **64**, 3385-3395.
- 795 Niehaus, T.D., Thamm, A.M., de Crecy-Lagard, V., and Hanson, A.D. (2015). Proteins of  
796 unknown biochemical function: a persistent problem and a roadmap to help overcome  
797 it. *Plant Physiology* **169**, 1436-1442.

- 798 **Nozue, K., Devisetty, U.K., Lekkala, S., Mueller-Moule, P., Bak, A., Casteel, C.L., and Maloof,**  
799 **J.N.** (2018). Network Analysis Reveals a Role for Salicylic Acid Pathway Components in  
800 Shade Avoidance. *Plant Physiology* **178**, 1720-1732.
- 801 **O'Malley, R.C., Huang, S.C., Song, L., Lewsey, M.G., Bartlett, A., Nery, J.R., Galli, M.,**  
802 **Gallavotti, A., and Ecker, J.R.** (2016). Cistrome and epicistrome features shape the  
803 regulatory DNA landscape. *Cell* **165**, 1280-1292.
- 804 **Obayashi, T., Aoki, Y., Tadaka, S., Kagaya, Y., and Kinoshita, K.** (2017). ATTED-II in 2018: a  
805 plant coexpression database based on investigation of the statistical property of the  
806 mutual rank index. *Plant and Cell Physiology* **59**, e3-e3.
- 807 **Rivas-San Vicente, M., and Plasencia, J.** (2011). Salicylic acid beyond defence: its role in plant  
808 growth and development. *J. Exp. Bot.* **62**, 3321-3338.
- 809 **Sauerbrunn, N., and Schlaich, N.L.** (2004). PCC1: a merging point for pathogen defence and  
810 circadian signalling in Arabidopsis. *Planta* **218**, 552-561.
- 811 **Segarra, S., Mir, R., Martinez, C., and Leon, J.** (2010). Genome-wide analyses of the  
812 transcriptomes of salicylic acid-deficient versus wild-type plants uncover Pathogen and  
813 Circadian Controlled 1 (PCC1) as a regulator of flowering time in Arabidopsis. *Plant Cell*  
814 *Environ.* **33**, 11-22.
- 815 **Sels, J., Mathys, J., De Coninck, B.M., Cammue, B.P., and De Bolle, M.F.** (2008). Plant  
816 pathogenesis-related (PR) proteins: a focus on PR peptides. *Plant Physiol. Biochem.* **46**,  
817 941-950.
- 818 **Shannon, P., Markiel, A., Ozier, O., Baliga, N.S., Wang, J.T., Ramage, D., Amin, N.,**  
819 **Schwikowski, B., and Ideker, T.** (2003). Cytoscape: A software environment for  
820 integrated models of biomolecular interaction networks. *Genome Res* **13**, 2498-2504.
- 821 **Sharpe, H.J., Stevens, T.J., and Munro, S.** (2010). A comprehensive comparison of  
822 transmembrane domains reveals organelle-specific properties. *Cell* **142**, 158-169.
- 823 **Shimada, T.L., Shimada, T., and Hara-Nishimura, I.** (2010). A rapid and non-destructive  
824 screenable marker, FAST, for identifying transformed seeds of *Arabidopsis thaliana*.  
825 *Plant Journal* **61**, 519-528.
- 826 **Spoel, S.H., Johnson, J.S., and Dong, X.** (2007). Regulation of tradeoffs between plant defenses  
827 against pathogens with different lifestyles. *Proc. Natl. Acad. Sci. USA* **104**, 18842-  
828 18847.
- 829 **Trapnell, C., Pachter, L., and Salzberg, S.L.** (2009). TopHat: discovering splice junctions with  
830 RNA-Seq. *Bioinformatics* **25**, 1105-1111.
- 831 **Tsuda, K., and Somssich, I.E.** (2015). Transcriptional networks in plant immunity. *New Phytol.*  
832 **206**, 932-947.
- 833 **Van Bel, M., Diels, T., Vancaester, E., Kreft, L., Botzki, A., Van de Peer, Y., Coppens, F., and**  
834 **Vandepoele, K.** (2018). PLAZA 4.0: an integrative resource for functional, evolutionary  
835 and comparative plant genomics. *Nucleic Acids Res* **46**, D1190-D1196.
- 836 **Van Gelderen, K., Kang, C., Paalman, R., Keuskamp, D., Hayes, S., and Pierik, R.** (2018). Far-  
837 red light detection in the shoot regulates lateral root development through the HY5  
838 transcription factor. *Plant Cell* **30**, 101-116.
- 839 **van Loon, L.C., Rep, M., and Pieterse, C.M.** (2006). Significance of inducible defense-related  
840 proteins in infected plants. *Annual Review of Phytopathology* **44**, 135-162.
- 841 **Vandepoele, K., Quimbaya, M., Casneuf, T., De Veylder, L., and Van de Peer, Y.** (2009).  
842 Unraveling transcriptional control in Arabidopsis using *cis*-regulatory elements and  
843 coexpression networks. *Plant Physiology* **150**, 535-546.
- 844 **Venancio, T.M., and Aravind, L.** (2010). CYSTM, a novel cysteine-rich transmembrane module  
845 with a role in stress tolerance across eukaryotes. *Bioinformatics* **26**, 149-152.
- 846 **Wang, D., Amornsiripanitch, N., and Dong, X.** (2006). A genomic approach to identify  
847 regulatory nodes in the transcriptional network of systemic acquired resistance in  
848 plants. *PLoS Pathog.* **2**, e123.

849 Windram, O., Madhou, P., McHattie, S., Hill, C., Hickman, R., Cooke, E., Jenkins, D.J., Penfold,  
850 C.A., Baxter, L., Breeze, E., Kiddle, S.J., Rhodes, J., Atwell, S., Kliebenstein, D.J., Kim,  
851 Y.S., Stegle, O., Borgwardt, K., Zhang, C.J., Tabrett, A., Legaie, R., Moore, J.,  
852 Finkenstadt, B., Wild, D.L., Mead, A., Rand, D., Beynon, J., Ott, S., Buchanan-  
853 Wollaston, V., and Denby, K.J. (2012). Arabidopsis defense against *Botrytis cinerea*:  
854 Chronology and regulation deciphered by high-resolution temporal transcriptomic  
855 analysis. *Plant Cell* **24**, 3530-3557.  
856 Xu, Y., Yu, Z., Zhang, S., Wu, C., Yang, G., Yan, K., Zheng, C., and Huang, J. (2019). CYSTM3  
857 negatively regulates salt stress tolerance in Arabidopsis. *Plant Mol. Biol.* **99**, 395-406.  
858 Xu, Y., Yu, Z., Zhang, D., Huang, J., Wu, C., Yang, G., Yan, K., Zhang, S., and Zheng, C. (2018).  
859 CYSTM, a Novel Non-Secreted Cysteine-Rich Peptide Family, Involved in Environmental  
860 Stresses in Arabidopsis thaliana. *Plant Cell Physiol.* **59**, 423-438.

861

## 862 Figure Legends

863 **Figure 1. Identification of groups of homologous, uncharacterized SA-inducible genes; Selection of**  
864 **the PCM gene family.** (A) Workflow to identify groups of homologous, unknown SA-inducible genes. First,  
865 SA-induced DEGs were grouped by DNA similarity using OrthoMCL. One pathogen-responsive group was  
866 subjected for further analysis using JackHMMER, followed by pair-wise similarity clustering, revealing a  
867 distinct family of eight homologous PCM genes. (B) DNA similarity matrix showing the 14 genes identified  
868 by the JackHMMER search. Red and blue indicate high and low similarity, respectively. Unsupervised  
869 hierarchical clustering identified a distinct group of PCM genes with high DNA similarity. (C) Amino acid  
870 sequence alignment of the eight PCMs. The conserved cysteine-rich transmembrane domain (CYSTM) is  
871 highlighted. (D) The locations of the eight PCM genes on the Arabidopsis chromosomes (Chr1 to Chr5). The  
872 different color gene names reflect PCM distribution across chromosomes.

873 **Figure 2. Expression behaviour of PCM genes.** (A) Genevestigator expression analysis. Shown is a  
874 heatmap of expression ratios for the PCM genes following treatments with biotic stressors/elicitors. On the  
875 microarrays from which these data are derived ( $P < 0.001$ ), probes for PCM2 are missing, and the probes  
876 for PCM5 and PCM6 are shared. (B) Temporal expression of PCM genes over a 16-h time course upon  
877 exogenous application of SA. Red and blue indicate increased and decreased expression, respectively. (C)  
878 Representation of DNA-binding motifs in the promoters of the PCM genes. Motifs are grouped according to  
879 cognate transcription factor family. The size and number in each circle represent the per-family motif count.

880 **Figure 3. Subcellular localization of PCM-YFP fusion proteins.** Confocal images of transiently  
881 transformed *N. benthamiana* epidermal leaf cells expressing the eight YFP-tagged PCM proteins under  
882 control of the CaMV 35S promoter. Representative fluorescence images are shown of PCM-YFP or free  
883 YFP (control) in the top panels, of FM 4-64 labelling of the membranes in the middle panels, and of the  
884 overlay of YFP and FM 4-64 in the bottom panels. Bar = 10  $\mu$ m.

885 **Figure 4. PCM coexpression networks.** Coexpression network obtained using the ATTED-II Network  
886 Drawer tool on whole-genome transcriptome data sets with PCM genes as bait. Hexagonal-shaped nodes  
887 indicate genes encoding transcriptional regulators. The thickness of the lines is proportional to the extent of  
888 coexpression of the linked gene.

889 **Figure 5. Overexpression of PCMs enhances resistance to Hpa and Pto DC3000.** (A), Quantification of  
890 *Hpa* Noco2 sporulation on 5-week-old wild-type (Col-0), *eds1-2* and transgenic lines constitutively  
891 overexpressing individual PCM genes under the control of the CaMV 35S promoter (PCM-OX) at 10 days

892 post inoculation (dpi) by spraying ( $n = 9-12$ ). **(B)**, Bacterial multiplication of *Pto* DC3000 in wild-type (Col-0),  
893 *eds1-2* and *PCM-OX* lines at 3 dpi by pressure infiltration ( $n = 8$ ). Means  $\pm$  SE (error bars) are shown. Letters  
894 denote significant differences between genotypes (one-way ANOVA, Tukey's post-hoc test,  $P < 0.05$ ).

895 **Figure 6. Transcriptome analysis of *PCM-OX* lines.** **(A)**, Heatmap (left) showing up- and downregulation  
896 of genes in the *PCM1-OX*, *PCM5-OX* or *PCM7-OX* lines in comparison to wild-type Col-0 plants, as revealed  
897 by RNA-seq analysis. **(B)**, Venn diagrams (right) indicating the overlap between DEGs in each of the *PCM-*  
898 *OX* lines.

899 **Figure 7. GO terms enriched among genes up- or downregulated in *PCM-OX* lines.** Shown are the GO  
900 terms significantly enriched among the genes that are significantly upregulated (top) or downregulated  
901 (bottom) in *PCM1-OX*, *PCM5-OX* and *PCM7-OX*, when compared to wild type.

902 **Figure 8. *PCM1*, *PCM5*, and *PCM7* influence hypocotyl elongation.** Hypocotyl lengths of 7-day-old Col-  
903 0, *PCM1-OX*, *PCM5-OX*, *PCM7-OX* and *hy5 hyh* seedlings grown *in vitro* in white light ( $n = 20$ ). Means  $\pm$   
904 SE (error bars) are shown. Letters denote significant differences between genotypes (one-way ANOVA,  
905 Tukey's post-hoc test,  $P < 0.05$ ). Inset: representative pictures of 7-day-old seedlings.

906

907

908

909

910

911

912

913



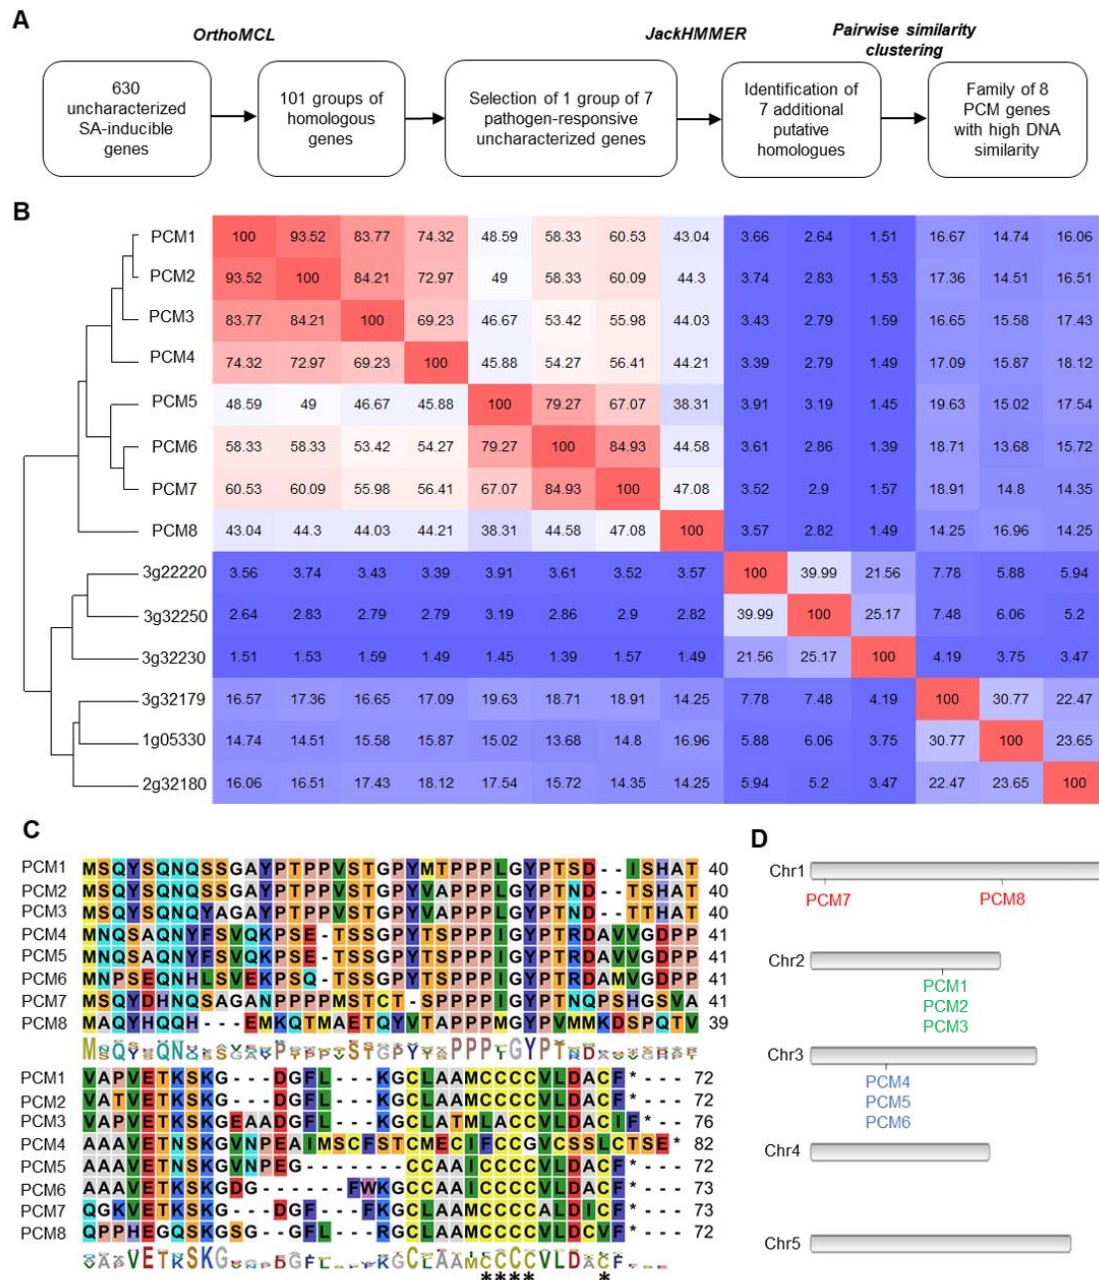

914

915 **Figure 1. Identification of groups of homologous, uncharacterized SA-inducible genes; Selection of**  
916 **the PCM gene family.** (A) Workflow to identify groups of homologous, unknown SA-inducible genes. First,  
917 SA-induced DEGs were grouped by DNA similarity using OrthoMCL. One pathogen-responsive group was  
918 subjected for further analysis using JackHMMER, followed by pair-wise similarity clustering, revealing a  
919 distinct family of eight homologous PCM genes. (B) DNA similarity matrix showing the 14 genes identified  
920 by the JackHMMER search. Red and blue indicate high and low similarity, respectively. Unsupervised  
921 hierarchical clustering identified a distinct group of PCM genes with high DNA similarity. (C) Amino acid  
922 sequence alignment of the eight PCMs. The conserved cysteine-rich transmembrane domain (CYSTM) is  
923 highlighted. (D) The locations of the eight PCM genes on the Arabidopsis chromosomes (Chr1 to Chr5). The  
924 different color gene names reflect PCM distribution across chromosomes.

925

926

927

928

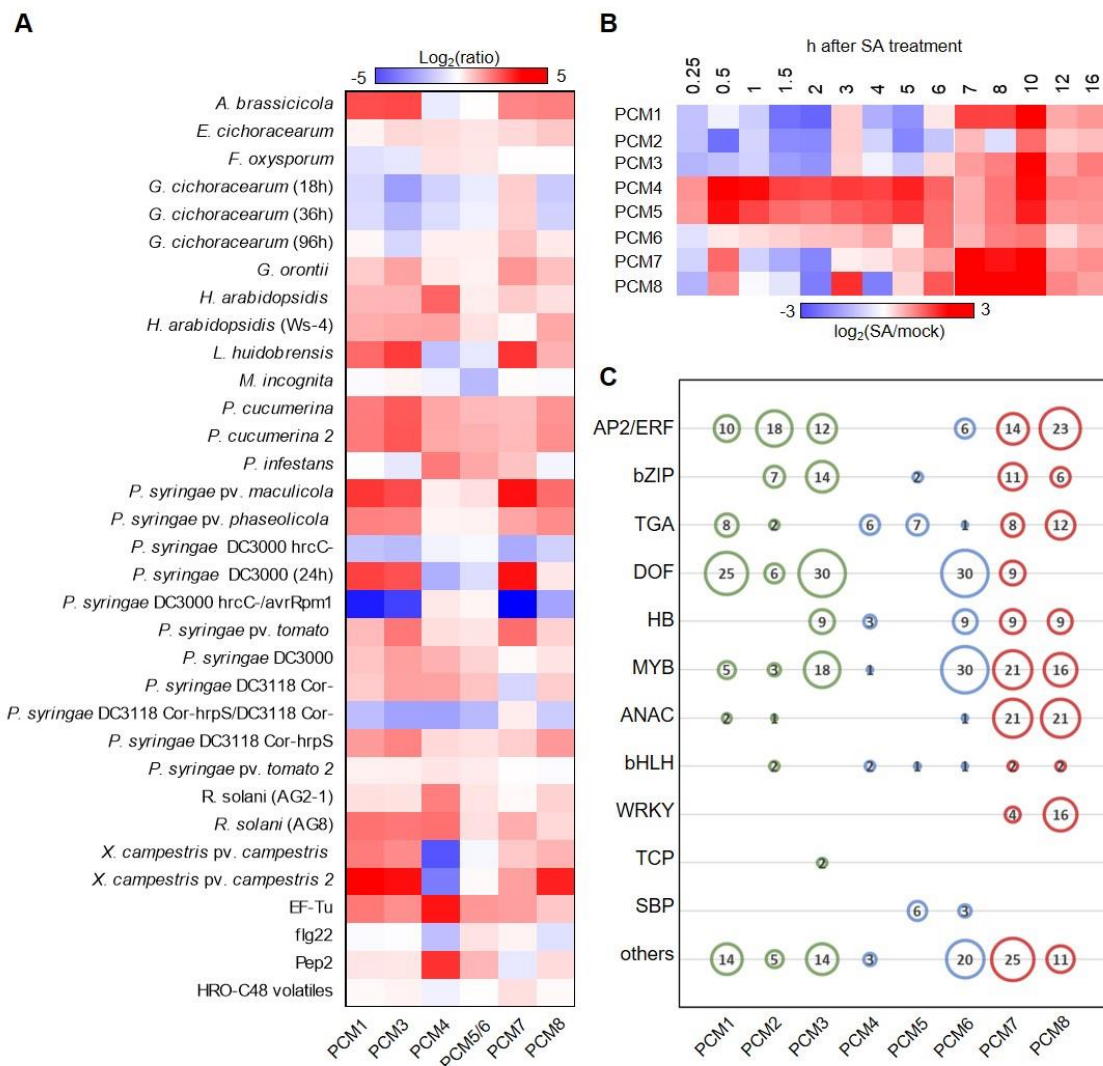

929

930 **Figure 2. Expression behaviour of PCM genes.** (A) Genevestigator expression analysis. Shown is a  
 931 heatmap of expression ratios for the PCM genes following treatments with biotic stressors/elicitors. On the  
 932 microarrays from which these data are derived ( $P < 0.001$ ), probes for PCM2 are missing, and the probes  
 933 for PCM5 and PCM6 are shared. (B) Temporal expression of PCM genes over a 16-h time course upon  
 934 exogenous application of SA. Red and blue indicate increased and decreased expression, respectively. (C)  
 935 Representation of DNA-binding motifs in the promoters of the PCM genes. Motifs are grouped according to  
 936 cognate transcription factor family. The size and number in each circle represent the per-family motif count.

937

938

939

940

941

942

943



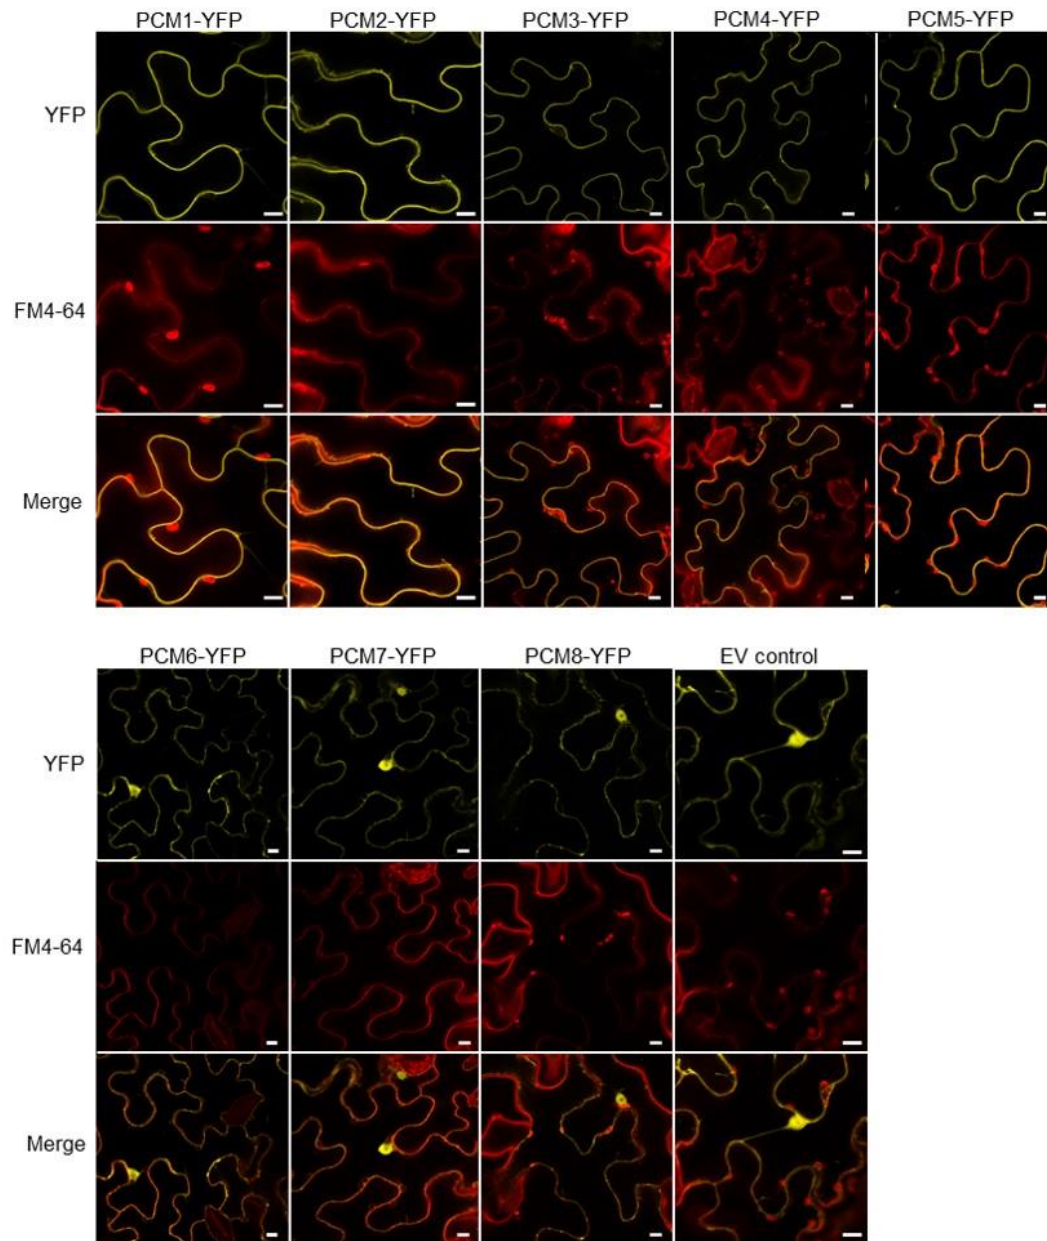

944

945 **Figure 3. Subcellular localization of PCM-YFP fusion proteins.** Confocal images of transiently  
946 transformed *N. benthamiana* epidermal leaf cells expressing the eight YFP-tagged PCM proteins under  
947 control of the CaMV 35S promoter. Representative fluorescence images are shown of PCM-YFP or free  
948 YFP (control) in the top panels, of FM 4-64 labelling of the membranes in the middle panels, and of the  
949 overlay of YFP and FM 4-64 in the bottom panels. Bar = 10  $\mu$ m.

950

951

952

953

954

955

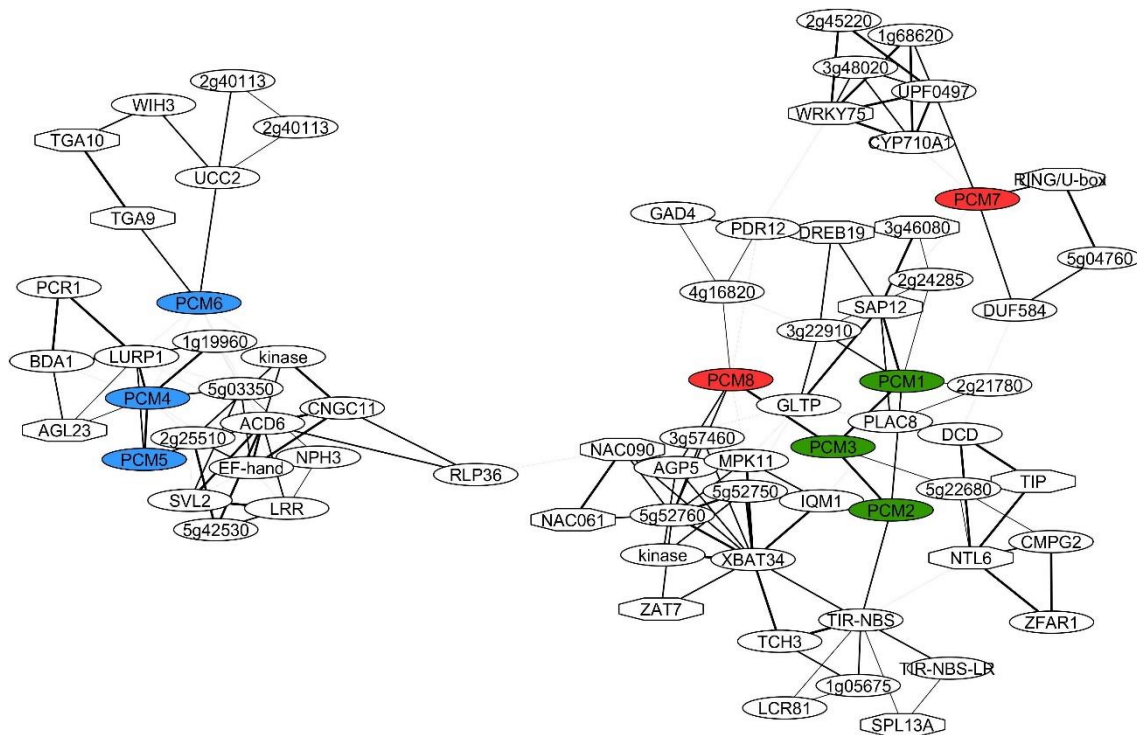

956

957 **Figure 4. PCM coexpression networks.** Coexpression network obtained using the ATTED-II Network  
958 Drawer tool on whole-genome transcriptome data sets with *PCM* genes as bait. Hexagonal-shaped nodes  
959 indicate genes encoding transcriptional regulators. The thickness of the lines is proportional to the extent of  
960 coexpression of the linked gene.

961

962

963

964

965

966

967

968

969

970

971

972

973

974

975

976

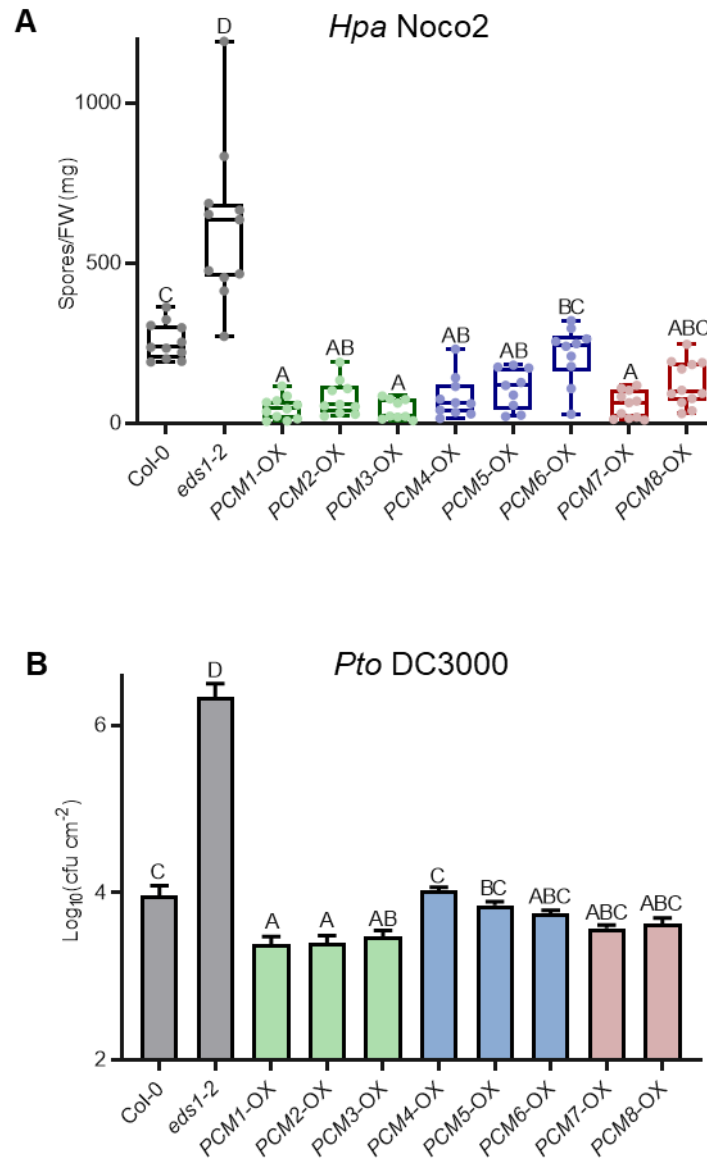

977

978 **Figure 5. Overexpression of PCMs enhances resistance to *Hpa* and *Pto DC3000*.** (A), Quantification of  
979 *Hpa Noco2* sporulation on 5-week-old wild-type (Col-0), *eds1-2* and transgenic lines constitutively  
980 overexpressing individual *PCM* genes under the control of the CaMV 35S promoter (*PCM-OX*) at 10 dpi by  
981 spraying ( $n = 9-12$ ). (B), Bacterial multiplication of *Pto DC3000* in wild-type (Col-0), *eds1-2* and *PCM-OX*  
982 lines at 3 dpi by pressure infiltration ( $n = 8$ ). Means  $\pm$  SE (error bars) are shown. Letters denote significant  
983 differences between genotypes (one-way ANOVA, Tukey's post-hoc test,  $P < 0.05$ ). Experiment repeated  
984 with similar results.

985

986

987

988

989

990

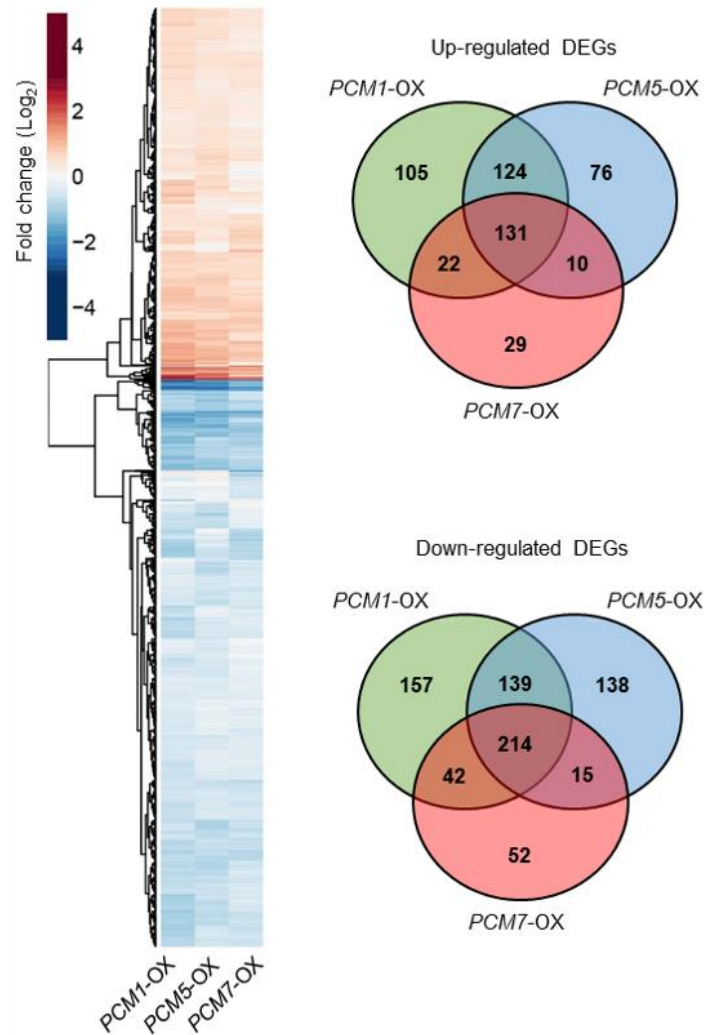

991

992 **Figure 6. Transcriptome analysis of PCM-OX lines.** (A), Heatmap (left) showing up- and downregulation  
993 of genes in the *PCM1-OX*, *PCM5-OX* or *PCM7-OX* lines in comparison to wild-type Col-0 plants, as revealed  
994 by RNA-seq analysis. (B), Venn diagrams (right) indicating the overlap between DEGs in each of the PCM-  
995 OX lines.

996

997

998

999

1000

1001

1002

1003

1004

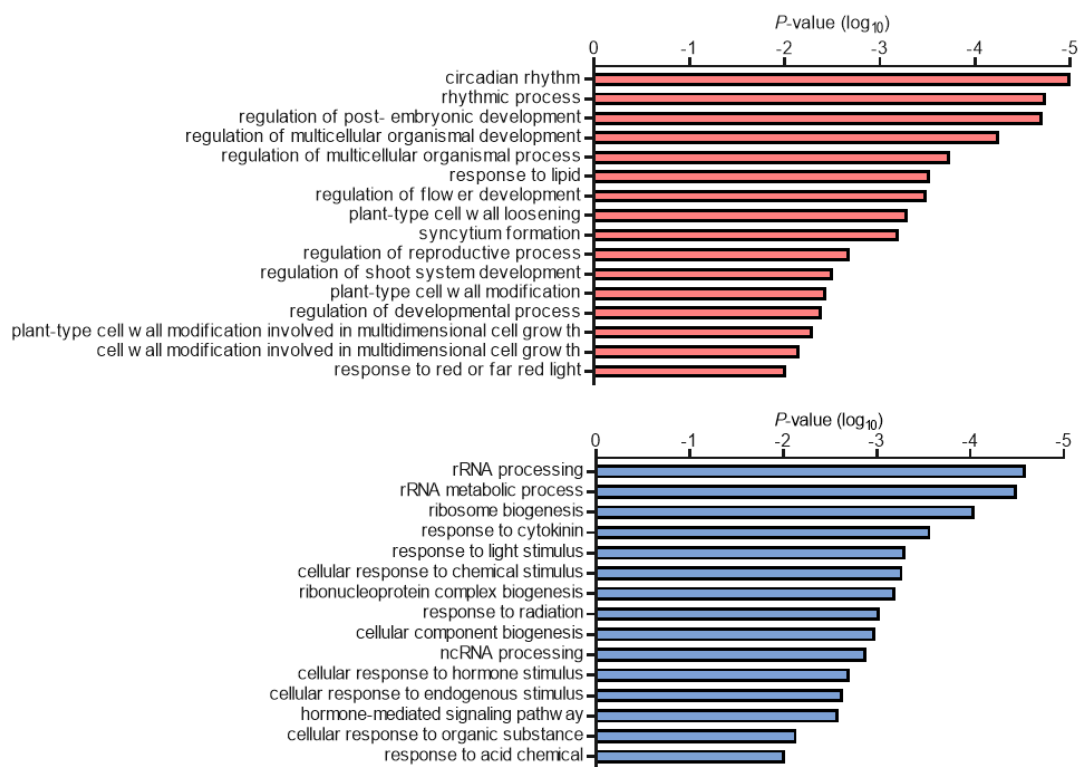

1005

1006 **Figure 7. GO terms enriched among genes up- or downregulated in PCM-OX lines.** Shown are the GO  
 1007 terms significantly enriched among the genes that are significantly upregulated (top) or downregulated  
 1008 (bottom) in *PCM1-OX*, *PCM5-OX* and *PCM7-OX*, when compared to wild type.

1009

1010

1011

1012

1013

1014

1015

1016

1017

1018

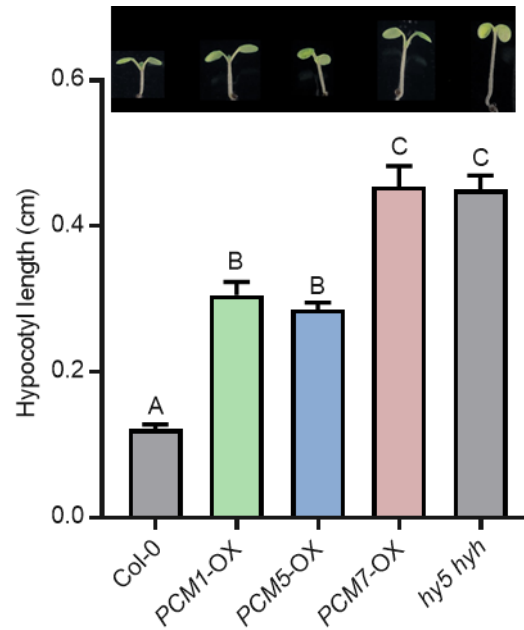

1019

1020 **Figure 8. PCM1, PCM5, and PCM7 influence hypocotyl elongation.** Hypocotyl lengths of 7-day-old Col-  
1021 0, *PCM1-OX*, *PCM5-OX*, *PCM7-OX* and *hy5 hyh* seedlings grown *in vitro* in white light ( $n = 20$ ). Means  $\pm$   
1022 SE (error bars) are shown. Letters denote significant differences between genotypes (one-way ANOVA,  
1023 Tukey's post-hoc test,  $P < 0.05$ ). Inset: representative pictures of 7-day-old seedlings. Experiment repeated  
1024 with similar results.

1025

1026

1027

1028

1029

1030

1031

1032

1033

1034

1035

1036

1037

1038

1039

1040

1041



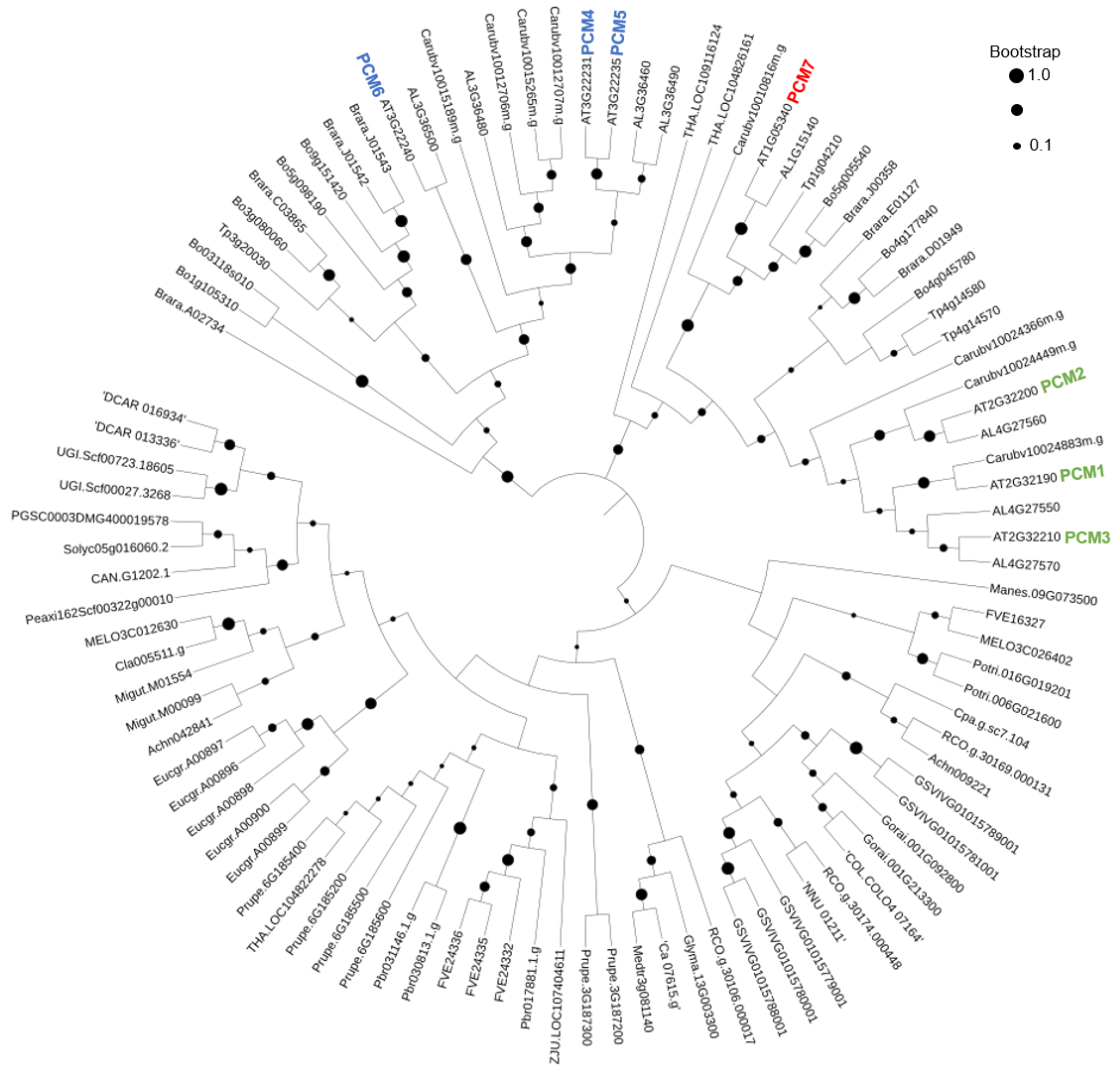

1042

1043 **Supplemental Figure S1.** Phylogenetic relationship of closely related homologs of the PCM gene family in  
1044 Arabidopsis and 32 other plant species. The PLAZA platform included the isoform of PCM8 in which the  
1045 CYSTM domain is excised, for this reason, PCM8 is not included in the phylogenetic tree. Differently sized  
1046 black dots indicate bootstrap support according to the legend on the top right.

1047

1048

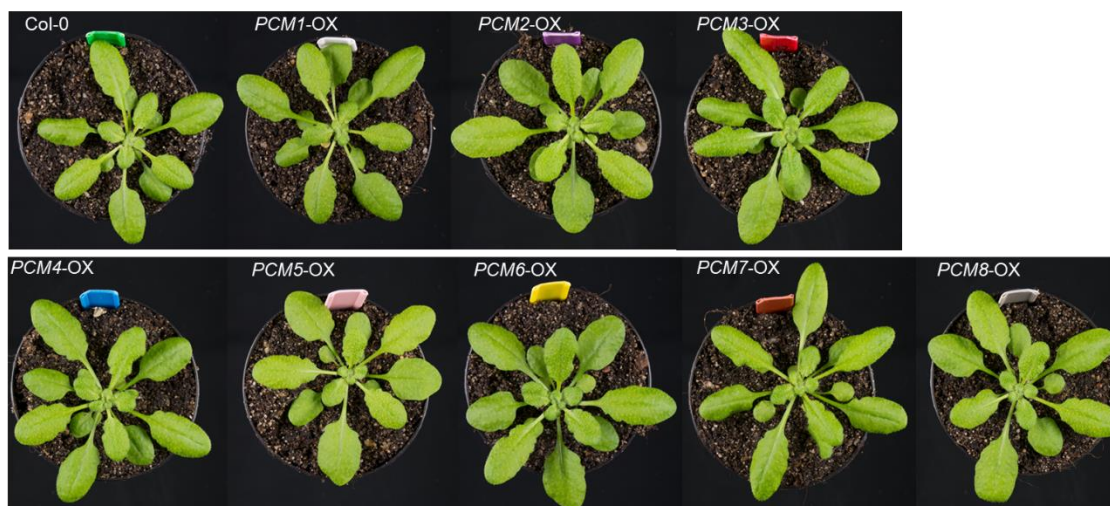

1049

1050 **Supplemental Figure S2.** Arabidopsis *PCMs-OX* growth development. Representative photos of 5-week-  
1051 old plants for each genotype.

1052

1053

1054

1055

1056

1057

1058

1059

1060

1061

1062

1063

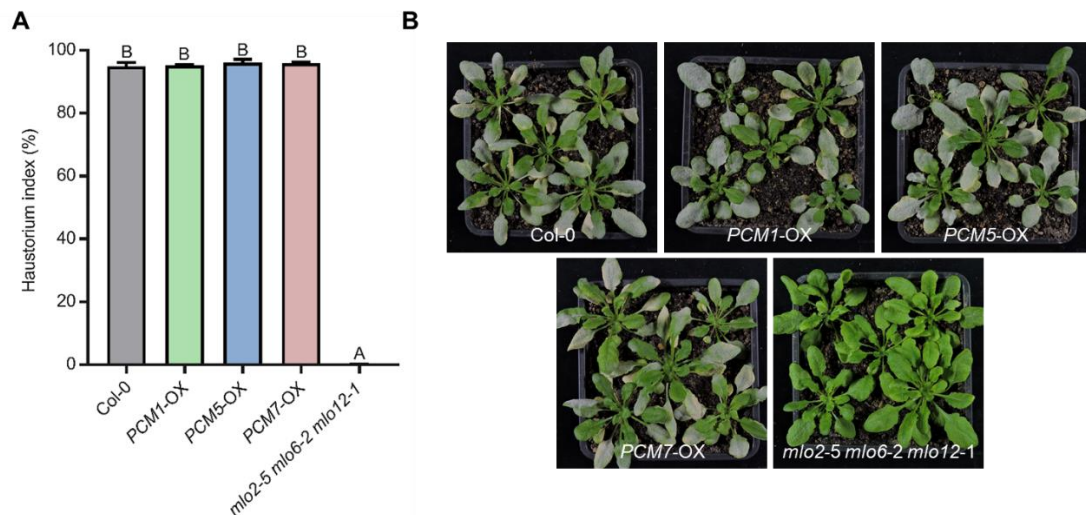

1064

1065 **Supplemental Figure S3.** Powdery mildew (*Golovinomyces orontii*) infection phenotypes of *PCM-OX* lines.  
 1066 (A), Quantitative analysis of host cell entry (at 48 hours post inoculation) on wild-type Col-0, the fully resistant  
 1067 *mlo2-5 mlo6-2 mlo12-1* triple mutant and *PCM1-OX*, *PCM5-OX* and *PCM7-OX* lines. Letters denote  
 1068 significant differences between genotypes (one-way ANOVA, Tukey's post-hoc test,  $P < 0.05$ ). (B),  
 1069 Macroscopic infection phenotypes of the same lines as shown in (A) at 12 days post inoculation.

1070 **Supplemental Table S1.** List of *PCM* genes, their AGI numbers (ID) and alternative names. Primer  
 1071 sequences used for cloning.

|             | ID        | Other name      | Forward and reverse primers (5' – 3')                              |
|-------------|-----------|-----------------|--------------------------------------------------------------------|
| <i>PCM1</i> | AT2G32190 | <i>ATCYSTM4</i> | F: ATGAGCCAATACAGCCAAAACCAATCTTC<br>R: GAAGCAGGCGTCGAGGACACAA      |
| <i>PCM2</i> | AT2G32200 | <i>ATCYSTM5</i> | F: ATGAGCCAATACAGTCAAACCAATATGCAG<br>R: GAAAATGCATGCGTCGAGGACGCAA  |
| <i>PCM3</i> | AT2G32210 | <i>ATCYSTM6</i> | F: ATGAGTCAATACAGCCAAAACCAATCTTCAG<br>R: GAAGCATGCGTCGAGGACACAACAA |
| <i>PCM4</i> | AT3G22231 | <i>PCC1</i>     | F: ATGAATCAATCCGCGCAAATTACTTTTCCG<br>R: CTCTGATGTACAGAGGCTGGAGCAT  |
| <i>PCM5</i> | AT3G22235 | <i>ATCYSTM8</i> | F: ATGAATCAATCCGCGCAAATTACTTTTCCG<br>R: GAAGCATGCATCCAGGACACAACAG  |
| <i>PCM6</i> | AT3G22240 | <i>ATCYSTM9</i> | F: ATGAATCCATCCGAGCAGAATCACTTGTC<br>R: GAAGCATGCATCCAGGACACAACAG   |
| <i>PCM7</i> | AT1G05340 | <i>ATCYSTM1</i> | F: ATGAGCCAGTACGATCACAACCAGTC<br>R: GAAGCAAATGTCCAGGGCACAACAG      |
| <i>PCM8</i> | AT1G56060 | <i>ATCYSTM3</i> | F: ATGGCTCAGTATCATCAACAGCATGAAATG<br>R: GAAGACACAATCCAAAACGCAGCAGC |

1072

1073
